# Supplementary material for: Revealing the selection history of adaptive loci using genome-wide scans for selection: an example from domestic sheep
Source: PubMed Central journal article supplement (PMC5778797; doi:10.1186/s12864-018-4447-x), 2018-01-23

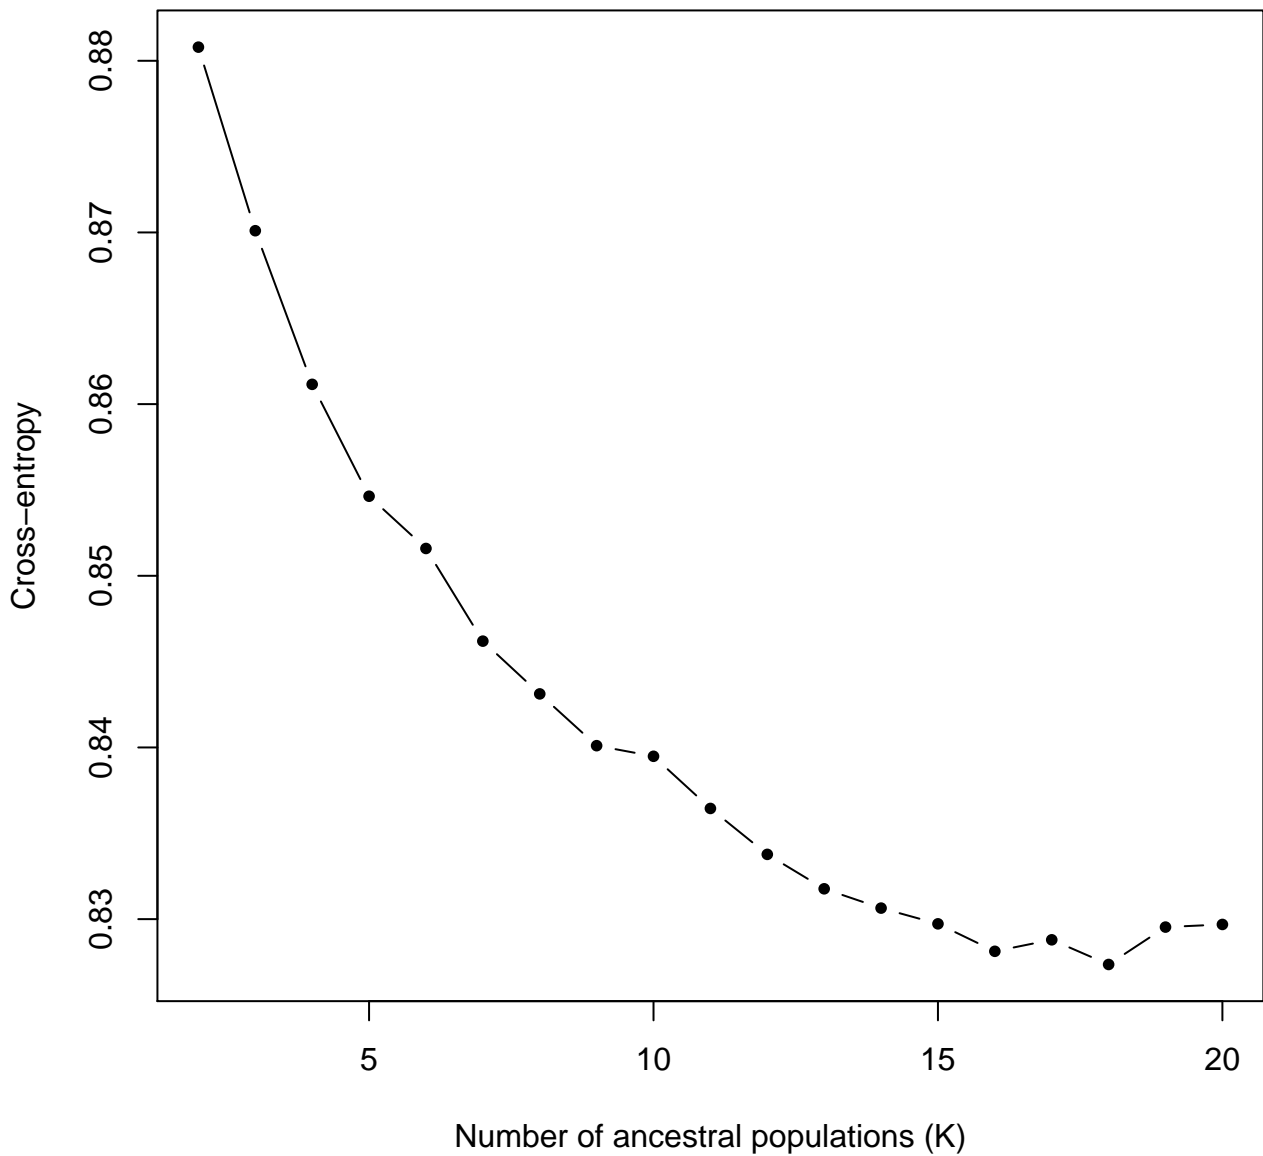

Supplement: 12864_2018_4447_MOESM1_ESM.pdf [file 12864_2018_4447_MOESM1_ESM.pdf]
