# Supplementary material for: Revealing the selection history of adaptive loci using genome-wide scans for selection: an example from domestic sheep
Source: PubMed Central journal article supplement (PMC5778797; doi:10.1186/s12864-018-4447-x), 2018-01-23
Supplement: 12864_2018_4447_MOESM5_ESM.pdf [file 12864_2018_4447_MOESM5_ESM.pdf]

| <b>Primer</b>  | <b>Sequence (5'3')</b> | <b>Strand</b> | <b>Location on OAR14 v3.1</b> | <b>Comments</b>                                  |
|----------------|------------------------|---------------|-------------------------------|--------------------------------------------------|
| MC1R_R2        | CAGGACACCAGCCTCCAG     | minus         | 14231888-14231905             | MC1R PCR amplification                           |
| MC1R_F2        | AGCCATGAGTTGAGCAGGAC   | plus          | 14231640-14231659             | MC1R PCR amplification and sequencing            |
| MC1R_R3        | ACATAGAGGACGGCCATCAG   | minus         | 14232191-14232210             | MC1R PCR amplification and sequencing            |
| MC1R_F3        | GTGAGCGTCAGCAACGTG     | plus          | 14231846-14231863             | MC1R PCR amplification and sequencing            |
| MC1R_R4        | TGGTCTAGCGATCCTCTTTG   | minus         | 14232595-14232614             | MC1R PCR amplification                           |
| MC1R_F4        | GCCTGGTTGGCTTCTTCATA   | plus          | 14232159-14232178             | MC1R PCR amplification and sequencing            |
| MC1R_tot_R     | CCTCTTTGTCAAGGGACTGC   | minus         | 14232583-14232602             | MC1R PCR amplification and sequencing            |
| MC1R_tot_F     | CTGAGAGCAAGCACCTTTC    | plus          | 14231661-14231680             | MC1R PCR amplification and sequencing            |
| MC1R_tot_R2    | GGGCCGACATTTGTCCAG     | plus          | 14231587-14231604             | MC1R PCR amplification and sequencing            |
| MC1R_regTot_F  | GGAGTGAACGAGGCAGAGAC   | plus          | 14228283-14228302             | MC1R long range PCR amplification and sequencing |
| MC1R_regTot_R  | TCTCCTGGGTTTCGTAGTGG   | minus         | 14235487-14235506             | MC1R long range PCR amplification and sequencing |
| MC1R_reg5_1_F  | GTCTGTTGGGGATCTTCTGG   | plus          | 14228907-14228888             | MC1R sequencing                                  |
| MC1R_reg5_2_F  | ACATGGTCTCACGTGGTGTG   | plus          | 14229619-14229638             | MC1R sequencing                                  |
| MC1R_reg5_3_F  | CAGGAACAGGCAAACAGTCC   | plus          | 14230160-14230141             | MC1R PCR amplification                           |
| MC1R_reg5_4_F  | TAGGAGGGTTTGTGTCGTCAGC | plus          | 14230754-14230773             | MC1R long range PCR amplification and sequencing |
| MC1R_reg5_5_F  | ACCTTCAGGAGGAGGGACTC   | plus          | 14231361-14231342             | MC1R long range PCR amplification and sequencing |
| MC1R_reg3_1_F  | TGAGAGGGGAATCACAGGAC   | plus          | 14232651-14232670             | MC1R sequencing                                  |
| MC1R_reg3_2_F  | TTCTGTCTGTGGTGCAAACC   | plus          | 14233259-14233278             | MC1R sequencing                                  |
| MC1R_reg3_3_F  | AGCTGAAACCAAACACAGG    | plus          | 14233974-14233993             | MC1R long range PCR amplification and sequencing |
| MC1R_reg3_4_F  | CCACTGCAGAGAGGAGCAG    | plus          | 14234589-14234607             | MC1R sequencing                                  |
| MC1R_reg5Tot_R | CTCAGGGTCCTGCTCAACTC   | minus         | 14231646-14231665             | MC1R PCR amplification                           |
| MC1R_reg5Tot_F | ACAGGTGTGACCCAGTCCTC   | plus          | 14228594-14228613             | MC1R long range PCR amplification and sequencing |
| MC1R_reg3_3_R  | CTTTGTCAGAAGGGGCAGAC   | minus         | 14234781-14234800             | MC1R PCR amplification and sequencing            |
| MC1R_reg5_3_R  | ACCTCCCTTCCCTGTCTAGG   | minus         | 14230588-14230607             | MC1R long range PCR amplification and sequencing |
| MC1R_reg3_2_R  | TCAGCCACAGCGTGATAGC    | minus         | 14234127-14234146             | MC1R PCR amplification and sequencing            |
