# Supplementary material for: Revealing the selection history of adaptive loci using genome-wide scans for selection: an example from domestic sheep
Source: PubMed Central journal article supplement (PMC5778797; doi:10.1186/s12864-018-4447-x), 2018-01-23
Supplement: 12864_2018_4447_MOESM7_ESM.pdf [file 12864_2018_4447_MOESM7_ESM.pdf]

| Populations | f3_statistic | f3_SE       | z-score  |
|-------------|--------------|-------------|----------|
| BER;RAM,TEX | 0.0292914    | 0.000607718 | 48.199   |
| RAM;BER,TEX | 0.0818687    | 0.000955433 | 85.6875  |
| TEX;BER,RAM | 0.0260161    | 0.000578346 | 44.9836  |
| BER;RMN,ROM | 0.0399587    | 0.000523378 | 76.3477  |
| RMN;BER,ROM | -0.0109204   | 0.00020695  | -52.7685 |
| ROM;BER,RMN | 0.0306937    | 0.000418983 | 73.2576  |
| IDF;TEX,MOU | 0.0166587    | 0.000310984 | 53.5675  |
| MOU;TEX,IDF | 0.0115723    | 0.000272959 | 42.3959  |
| TEX;MOU,IDF | 0.026107     | 0.000439397 | 59.4156  |
