# Supplementary material for: Revealing the selection history of adaptive loci using genome-wide scans for selection: an example from domestic sheep
Source: PubMed Central journal article supplement (PMC5778797; doi:10.1186/s12864-018-4447-x), 2018-01-23
Supplement: 12864_2018_4447_MOESM8_ESM.pdf [file 12864_2018_4447_MOESM8_ESM.pdf]

**Supporting information: FLK results by region: SNP frequencies, local trees and haplotype cluster frequencies**

Breeds:

| <b>Breed</b>              | <b>Abbreviation</b> |
|---------------------------|---------------------|
| Berrichon du Cher         | BER                 |
| Blanche du Massif Central | BMC                 |
| Causse du Lot             | CDL                 |
| Charollais                | CHA                 |
| Charmoise                 | CHR                 |
| Corse                     | COR                 |
| European Mouflon          | EUR                 |
| Île de France             | IDF                 |
| Asian Mouflon             | IRN                 |
| Lacaune (dairy)           | LAC                 |
| Lacaune (meat)            | LAM                 |
| Limousine                 | LIM                 |
| Mérinos d'Arles           | MER                 |
| Mourerous                 | MOU                 |
| Manech tête rousse        | MTR                 |
| Noire du Velay            | NVE                 |
| Ouessant                  | OUE                 |
| Préalpes du Sud           | PAS                 |
| Mérinos de Rambouillet    | RAM                 |
| Rava                      | RAV                 |
| Romane / INRA 401         | RMN                 |
| Romanov                   | ROM                 |
| Roussin de la Hague       | ROU                 |
| Rouge de l'Ouest          | RWE                 |
| Suffolk                   | SUF                 |
| Tarasconnaise             | TAR                 |
| Texel                     | TEX                 |
| Vendéen                   | VEN                 |

Population tree estimated from all SNPs

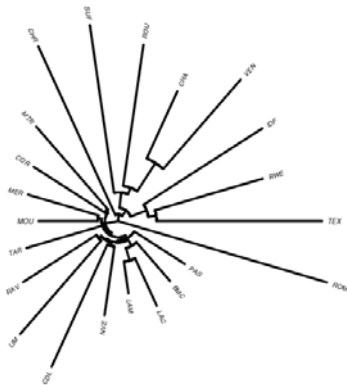

\*In SNP frequency and haplotype cluster frequency plots the red dotted line is the SNP with the smallest p value and the two black lines are the beginning and end of candidate genes.

| Region |          |          |
|--------|----------|----------|
| Chr    | Begin    | End      |
| 1      | 27383208 | 30143421 |

Best SNP: 28596396  
 Located in *SSBP3* [1].

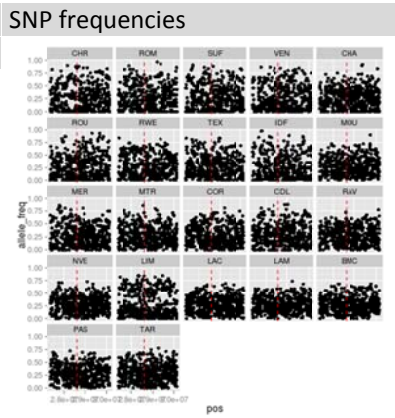

SNP local tree

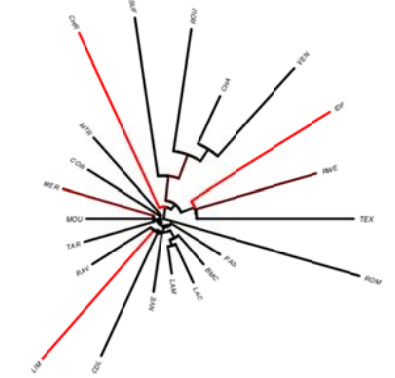

Haplotype local tree

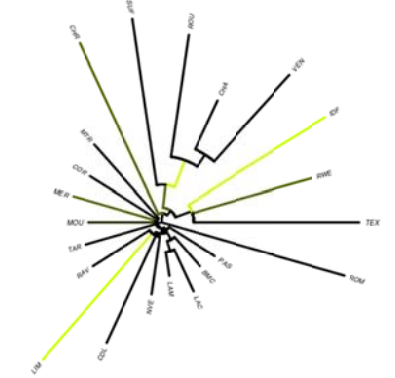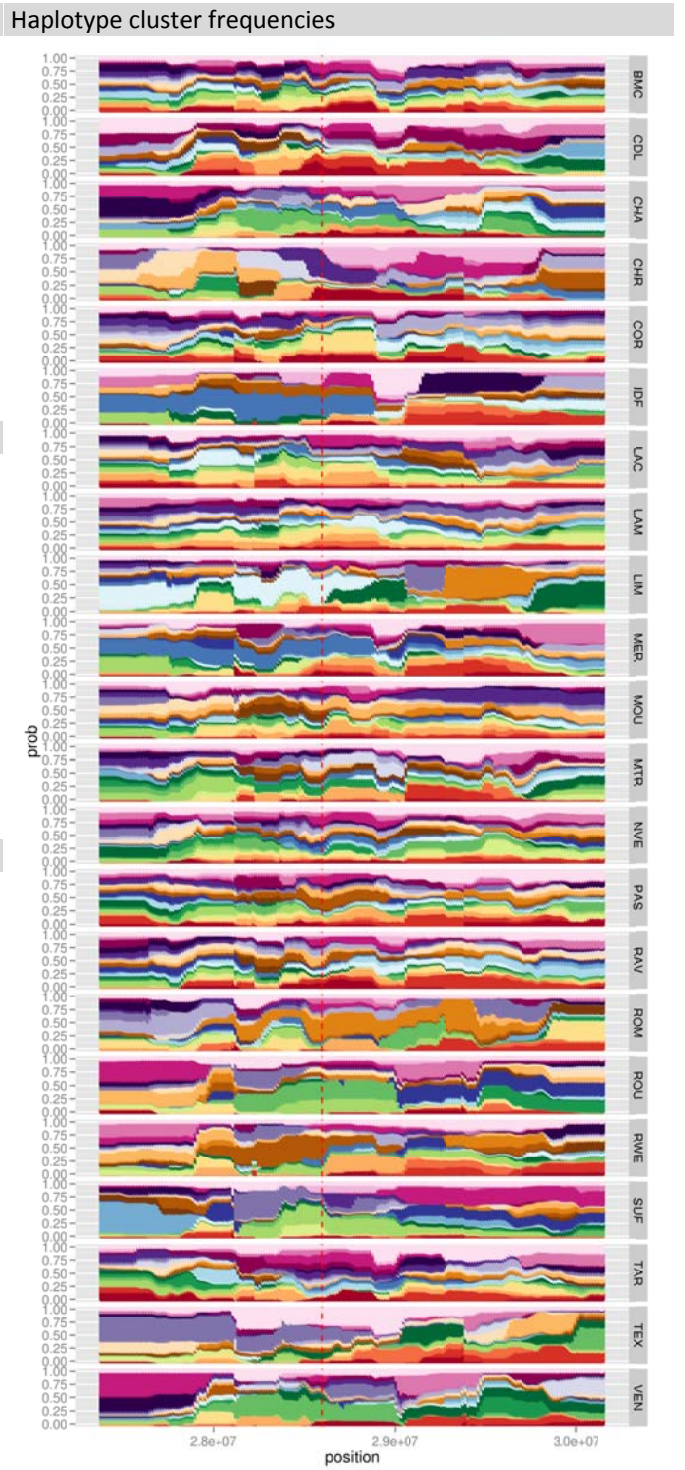

| Region |          |          |
|--------|----------|----------|
| Chr    | Begin    | End      |
| 1      | 38836829 | 39720090 |

Best SNP: 39170368  
 Located in *ROR1* [1].

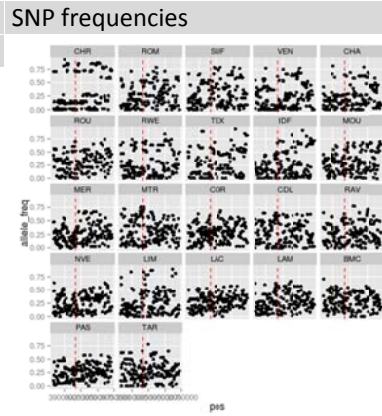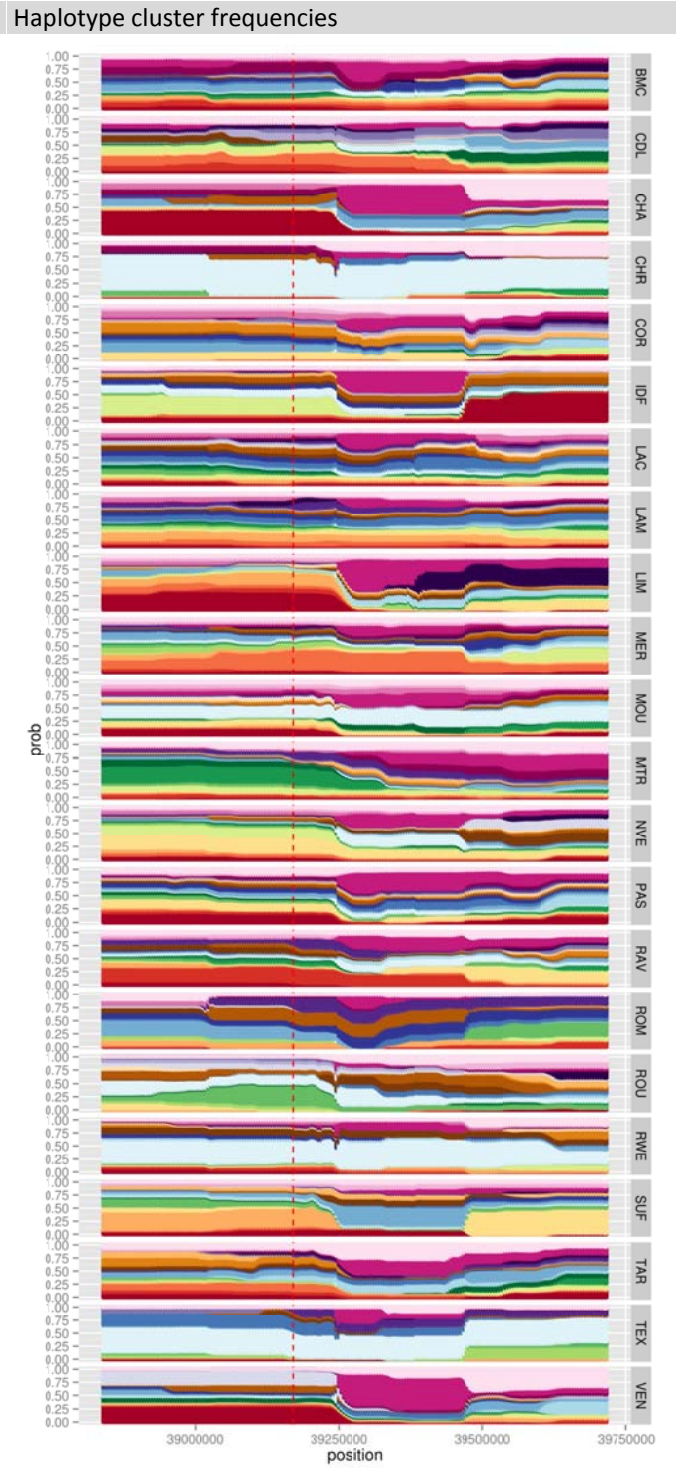

SNP local tree

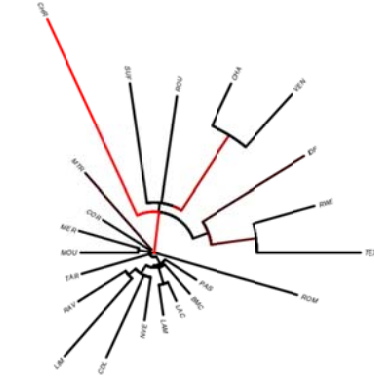

Haplotype local tree

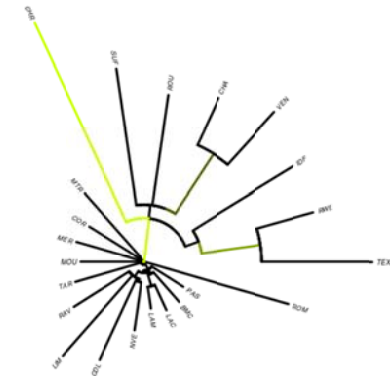

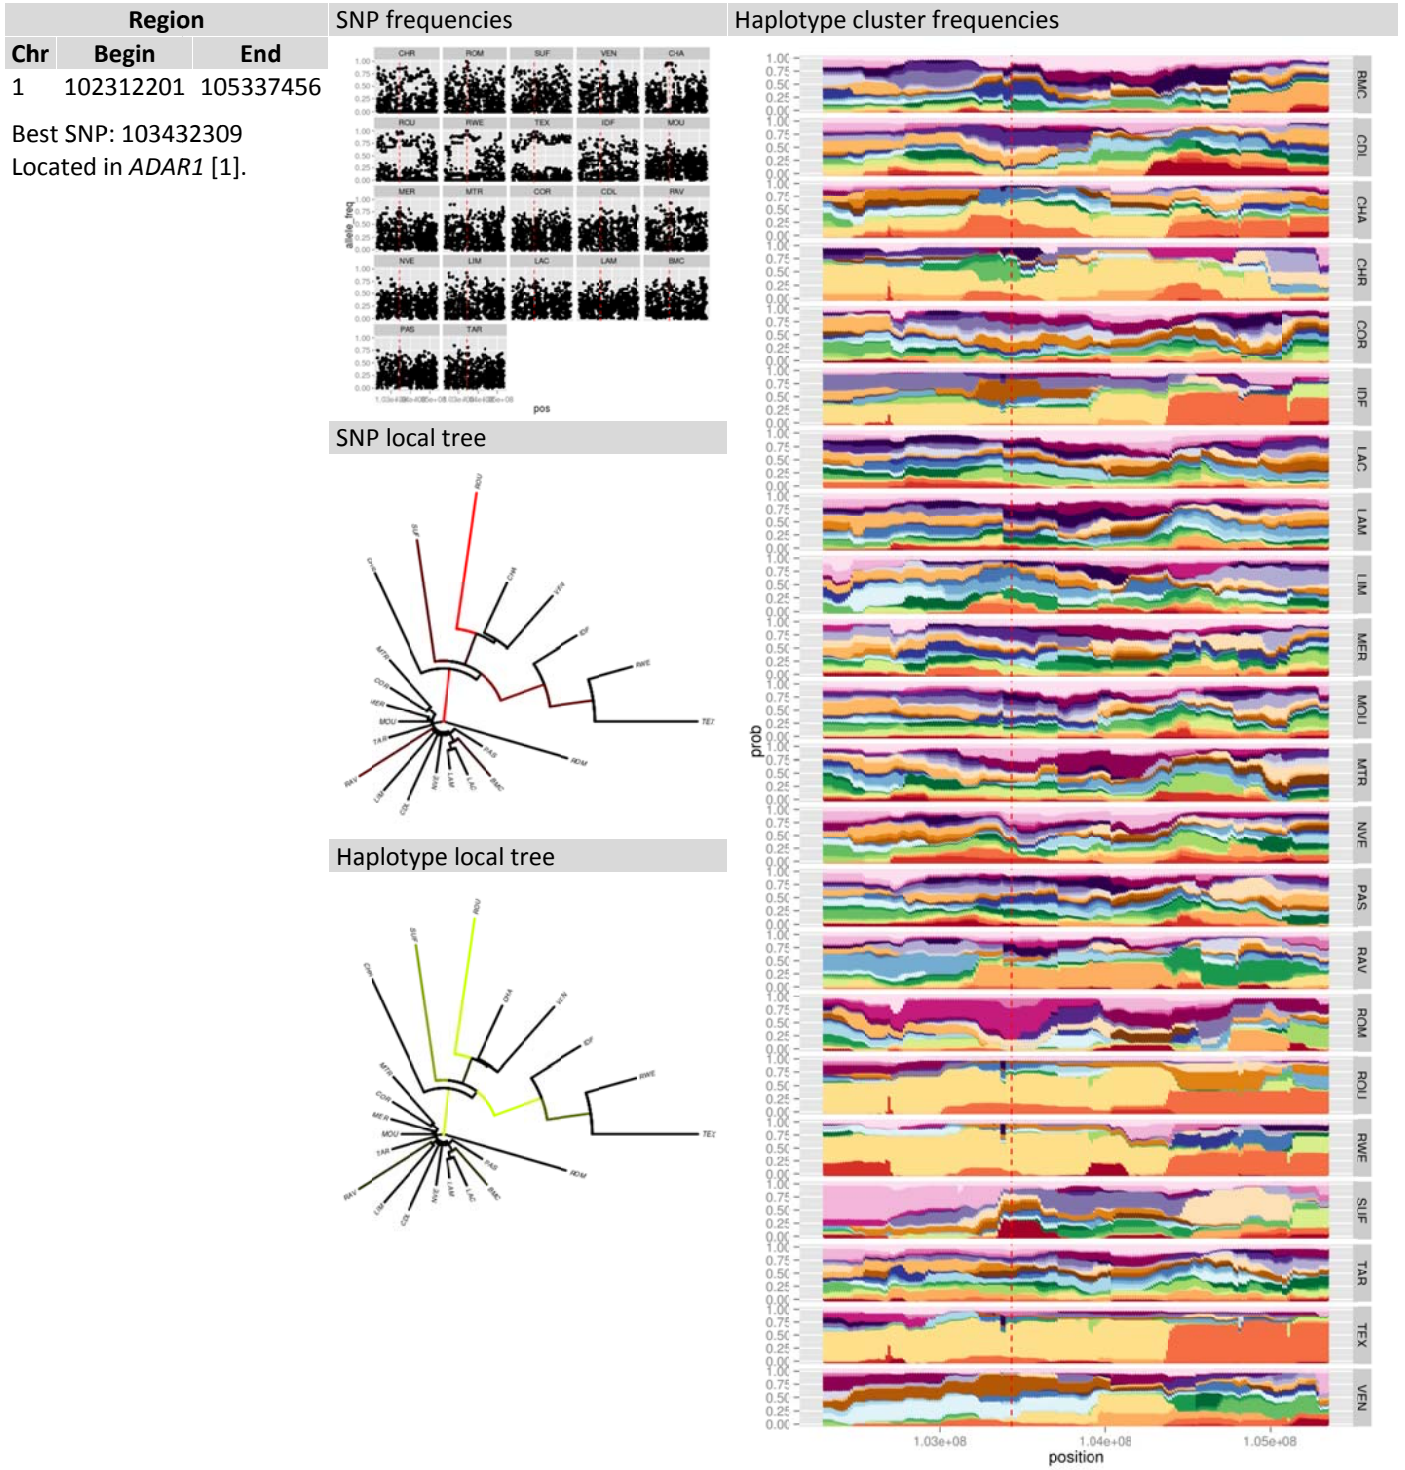

| Region |           |           |
|--------|-----------|-----------|
| Chr    | Begin     | End       |
| 1      | 119252967 | 120575235 |

Best SNP: 120554658  
 Located in *IFNAR2* [1].

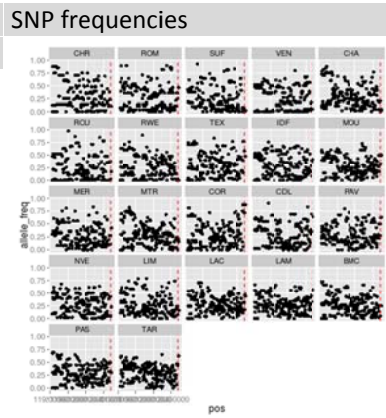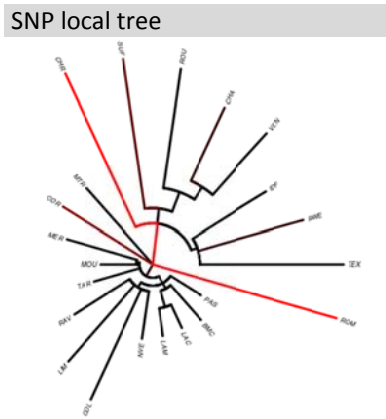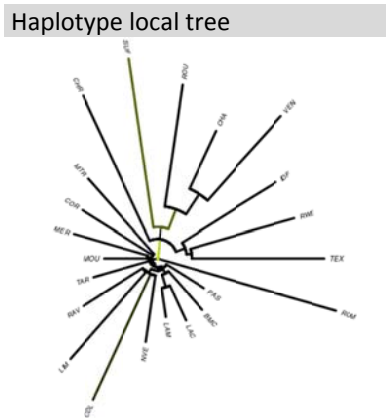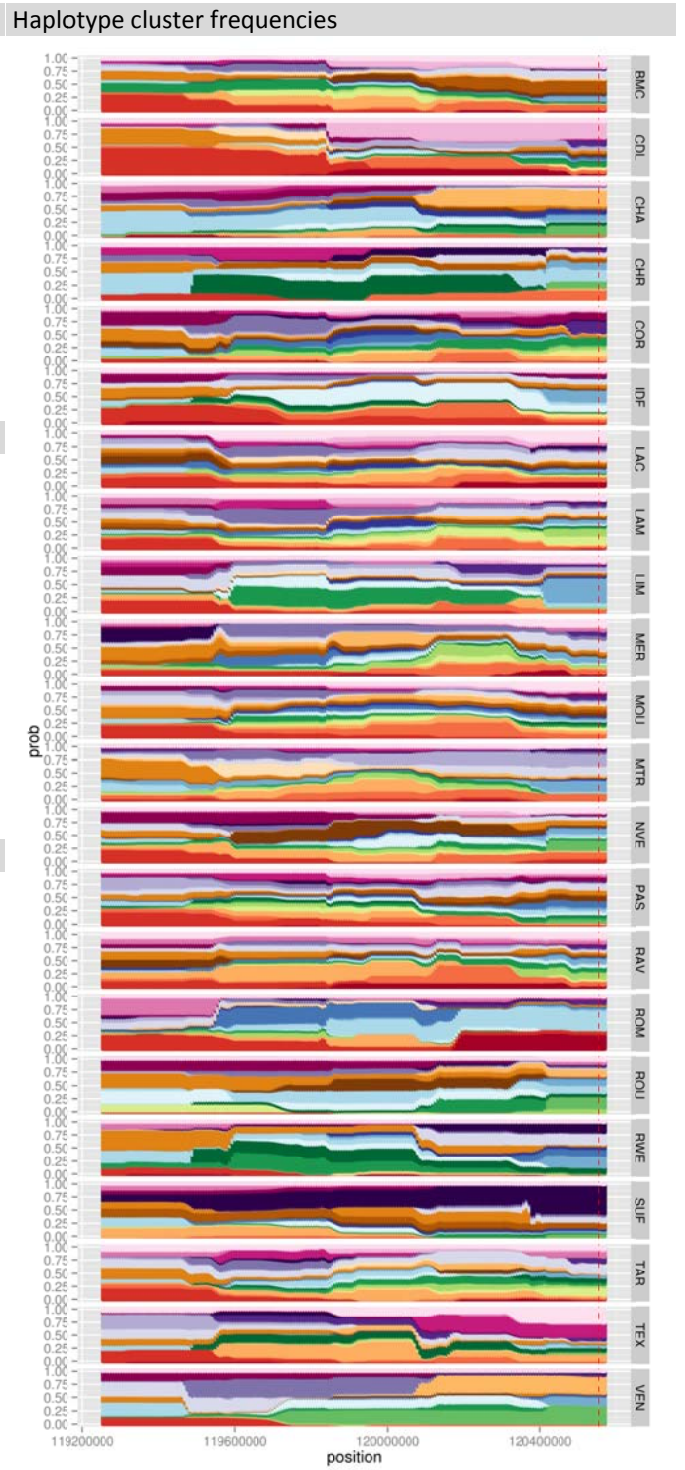

| Region |          |          |
|--------|----------|----------|
| Chr    | Begin    | End      |
| 2      | 38096770 | 42417880 |

Best SNP: 39454479  
 Located in *EBF2* [1]  
 (involved in brown fat fate and function in mice [2]).

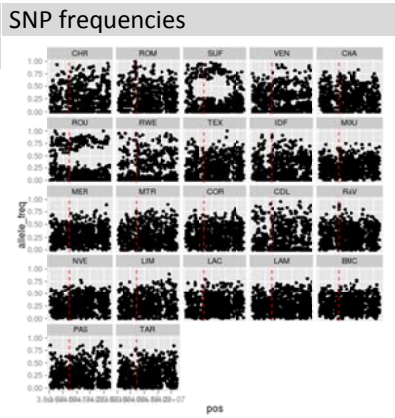

SNP local tree

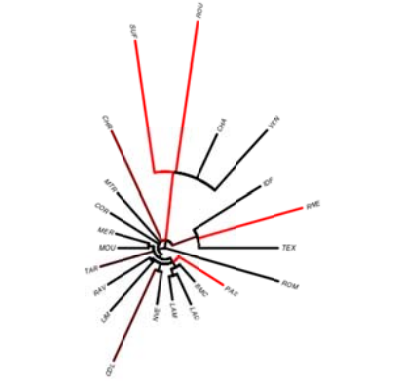

Haplotype local tree

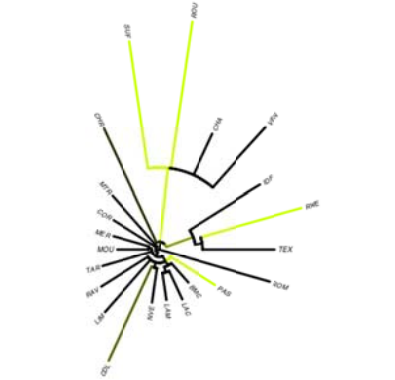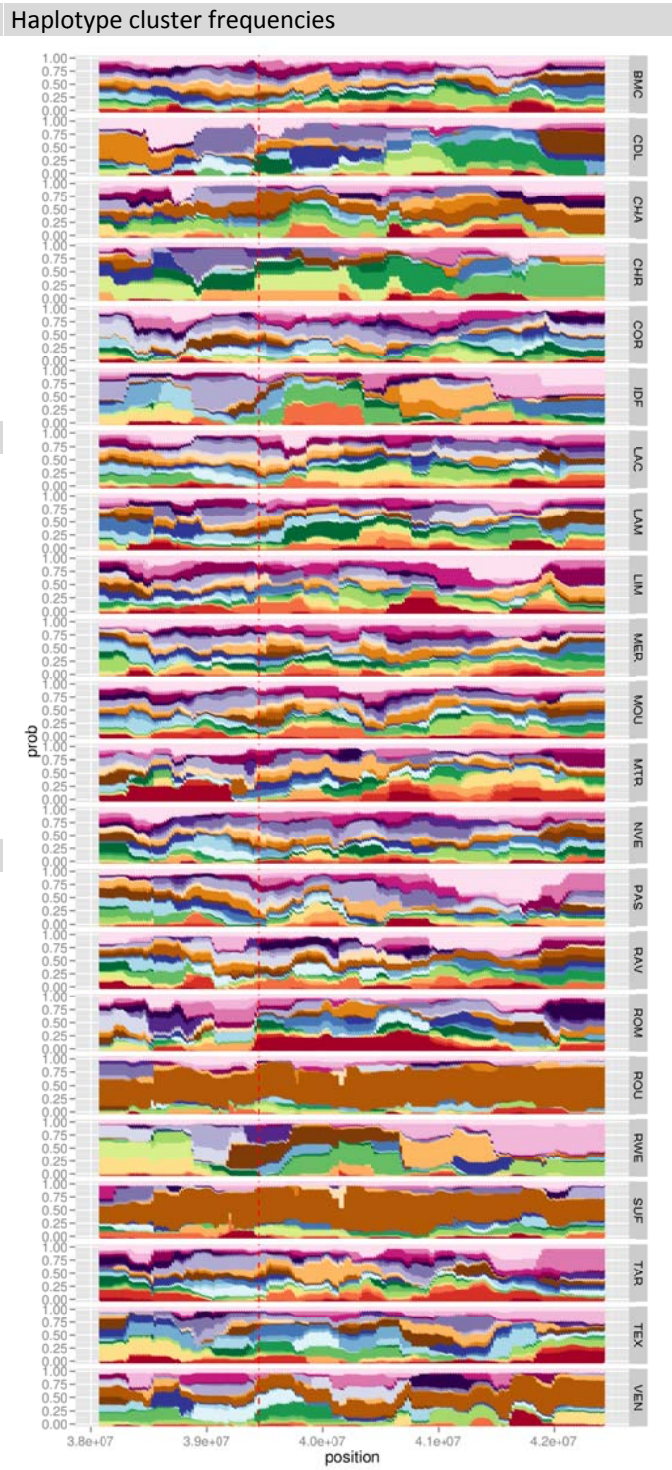

| Region |          |          |
|--------|----------|----------|
| Chr    | Begin    | End      |
| 2      | 51788434 | 52911940 |

Best SNP: 52429848  
 Located in *NPR2* [1]  
 (mutations in *NPR2*  
 associated with height in  
 humans [3]).

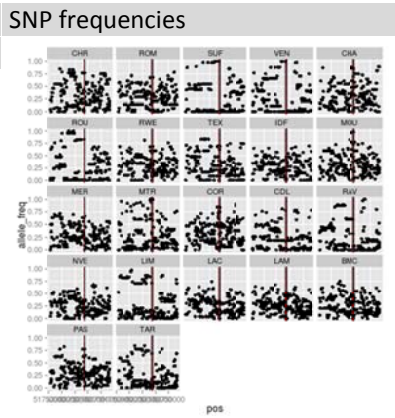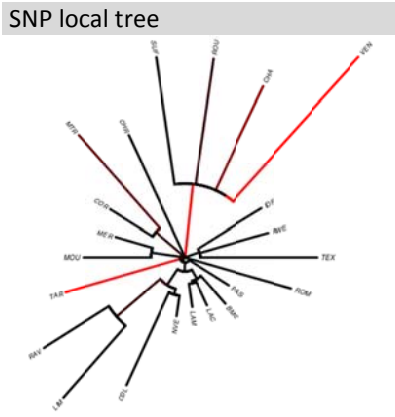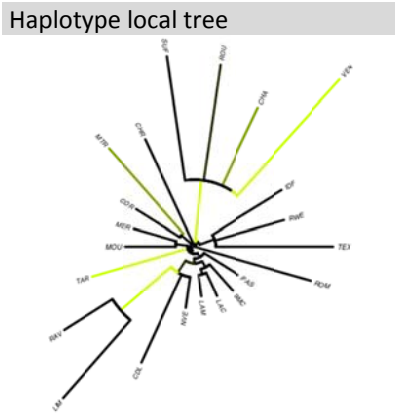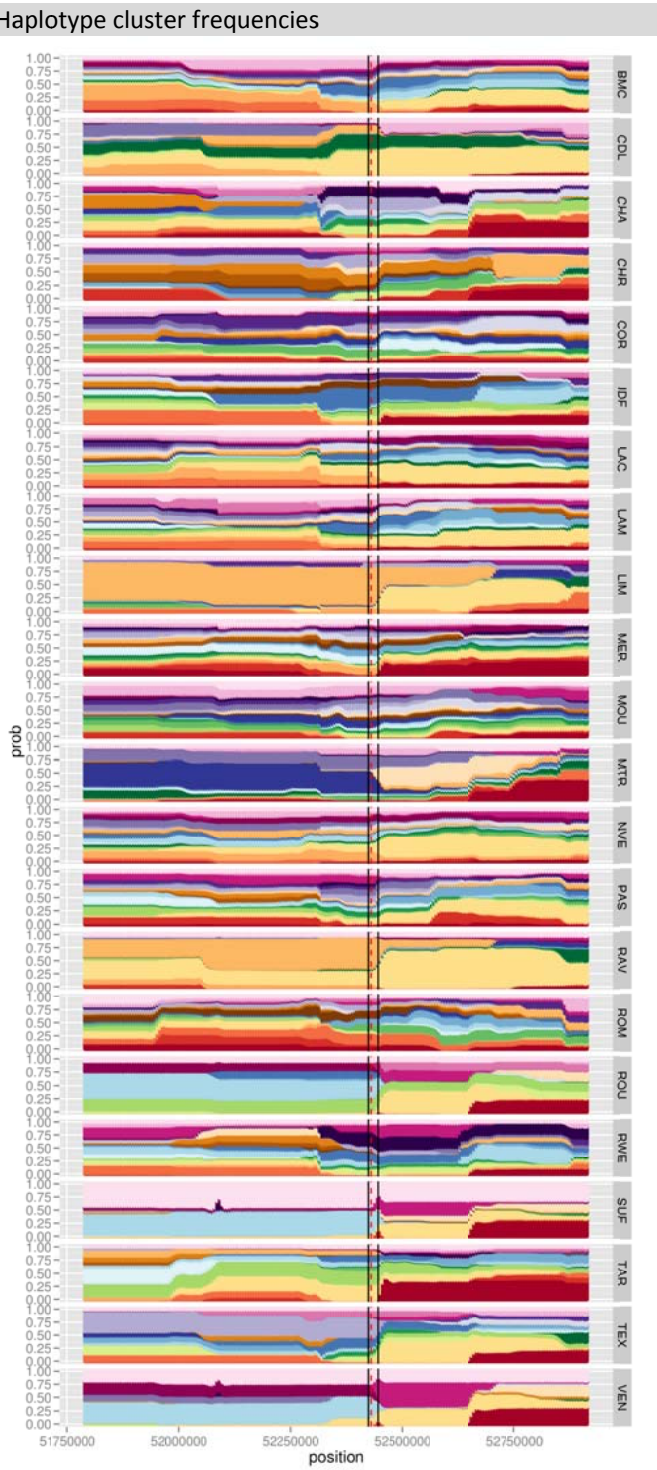

| Region |          |          |
|--------|----------|----------|
| Chr    | Begin    | End      |
| 2      | 73868893 | 81869098 |

Best SNP: 78924564  
Candidate gene: *TYRP1* (a mutation in *TYRP1* in Soay sheep is associated with light coat colour [4]).

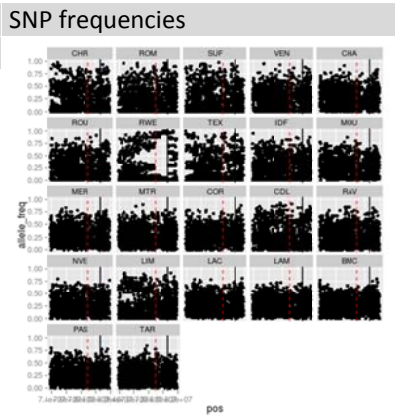

SNP local tree

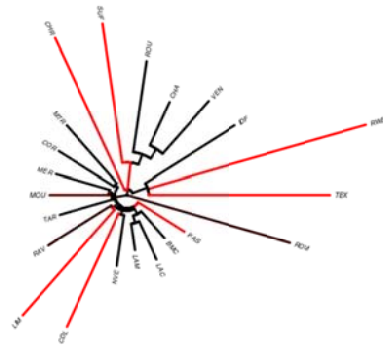

Haplotype local tree

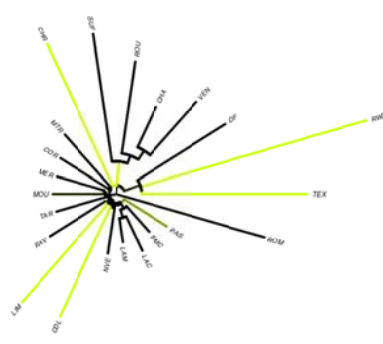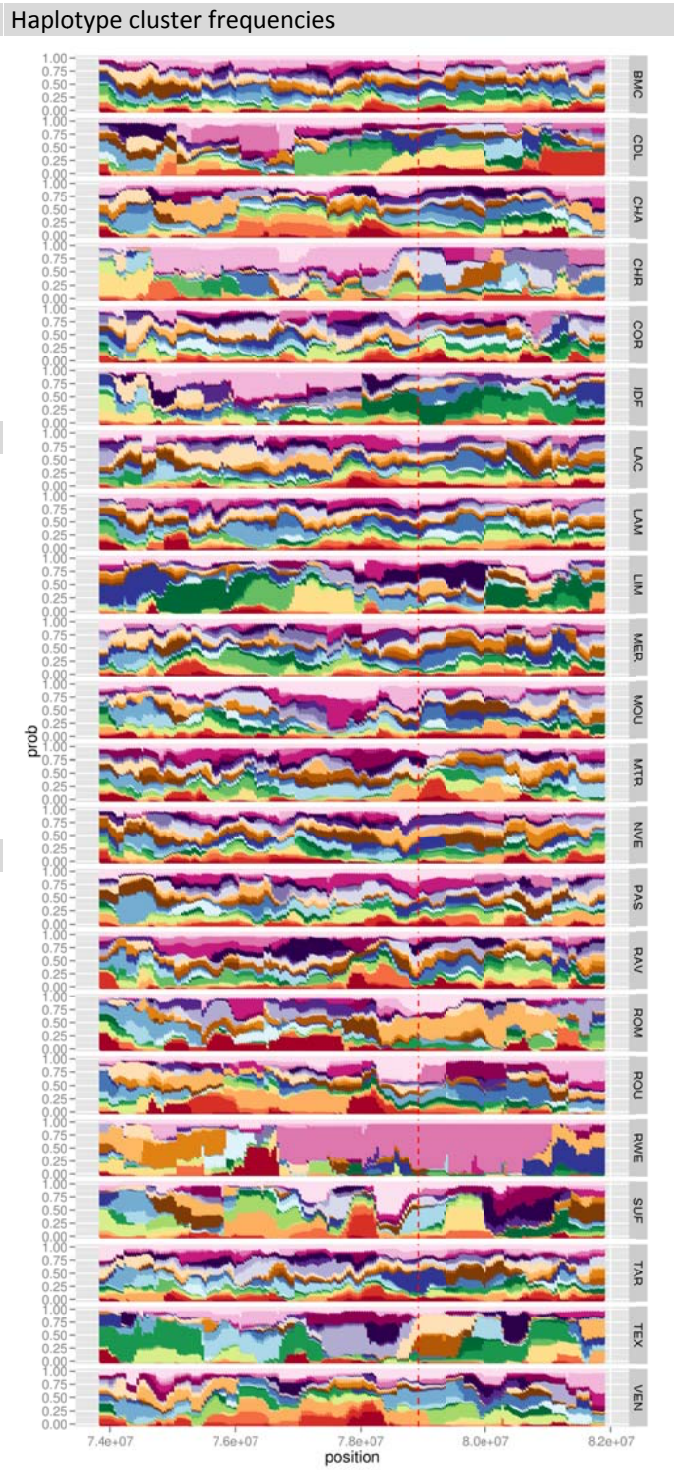



| Region |          |          |
|--------|----------|----------|
| Chr    | Begin    | End      |
| 2      | 83470886 | 85199700 |

Best SNP: 84698214  
Candidate gene: *BNC2*  
(mutations in *BNC2* in humans is associated with skin colour in humans [5]).

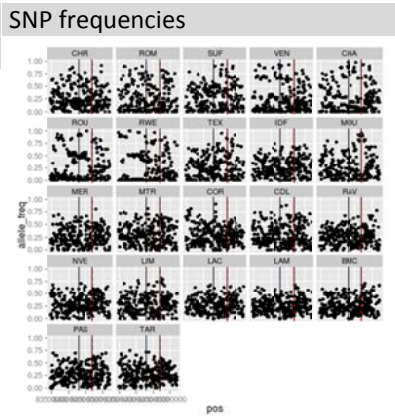

SNP local tree

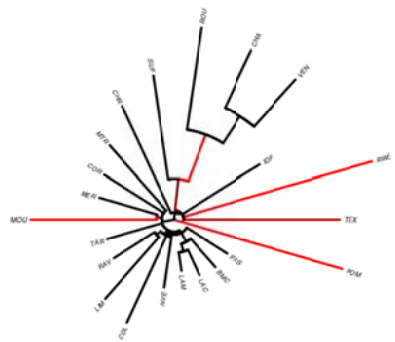

Haplotype local tree

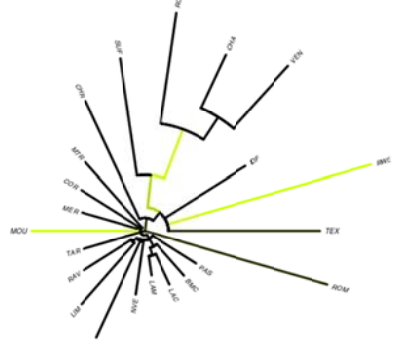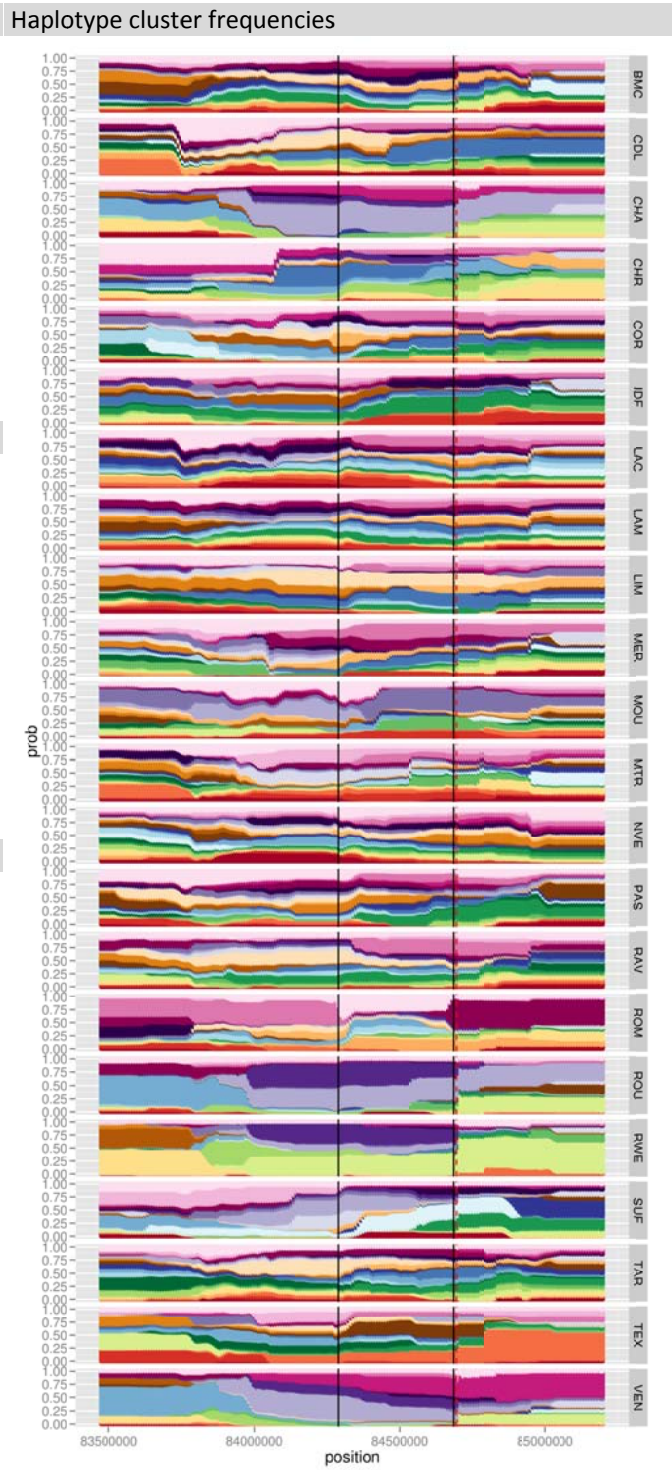

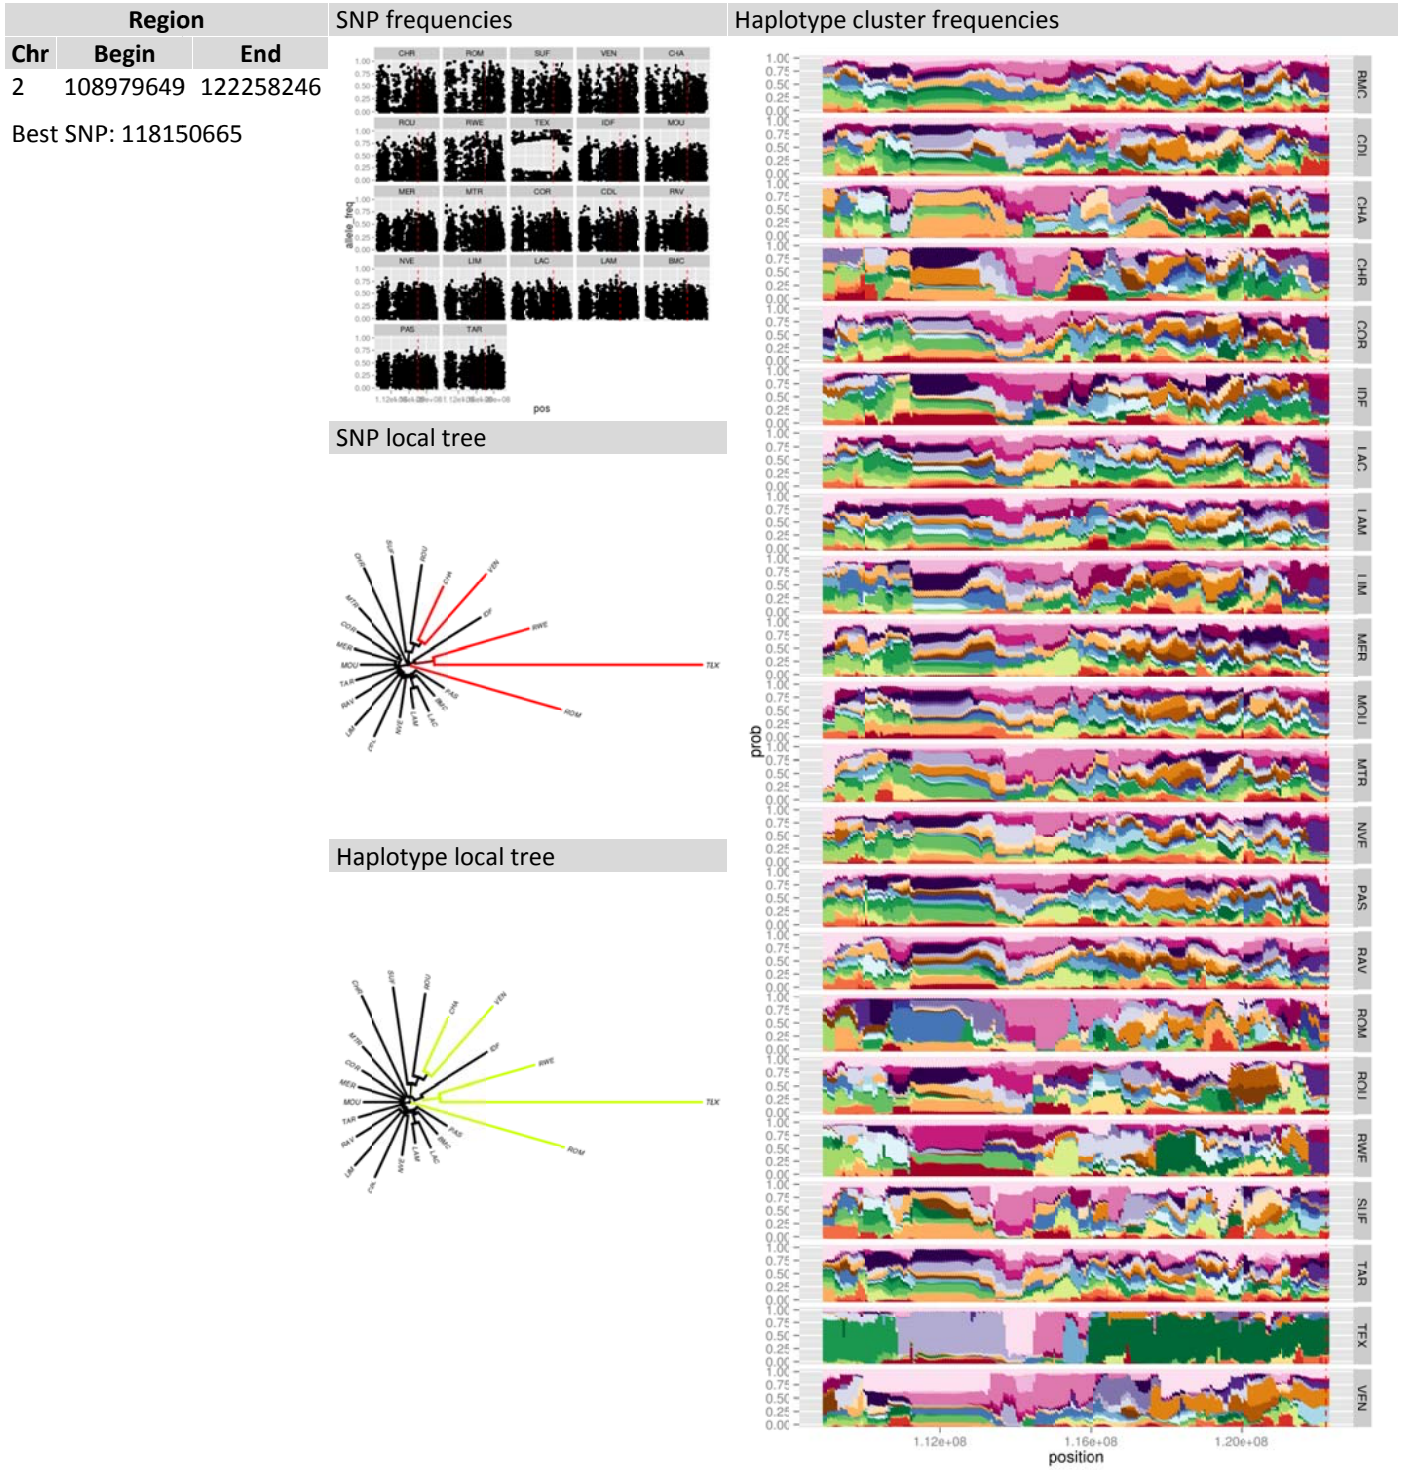



| Region |  |  | SNP frequencies | Haplotype cluster frequencies |
|--------|--|--|-----------------|-------------------------------|
|--------|--|--|-----------------|-------------------------------|

| Chr | Begin    | End      |
|-----|----------|----------|
| 3   | 61876792 | 62174495 |

Best SNP: 62099364

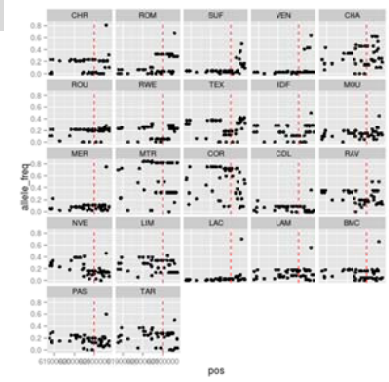

SNP local tree

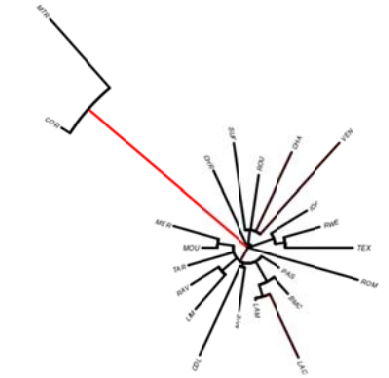

Haplotype local tree

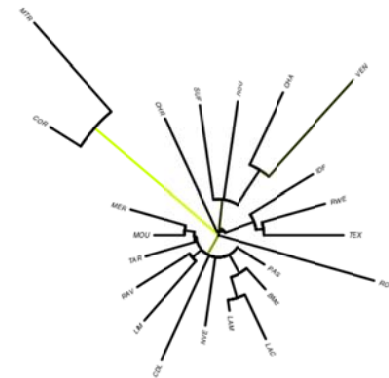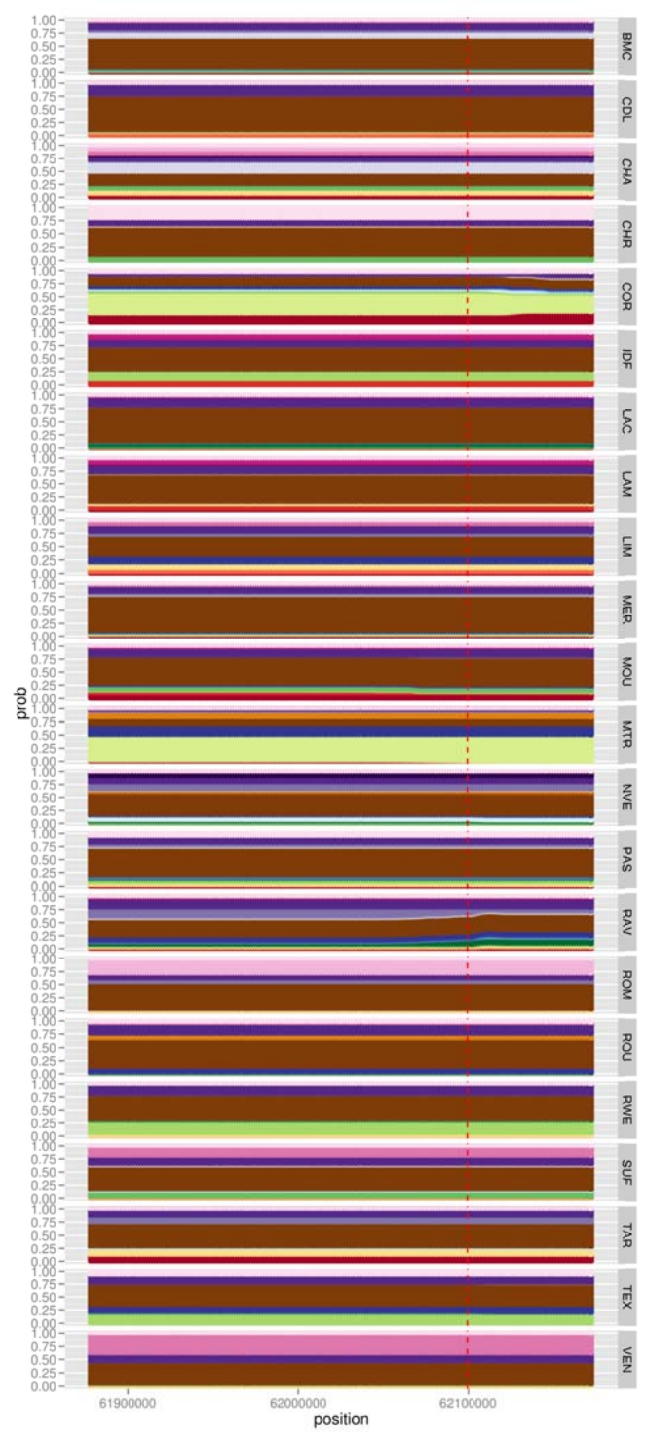

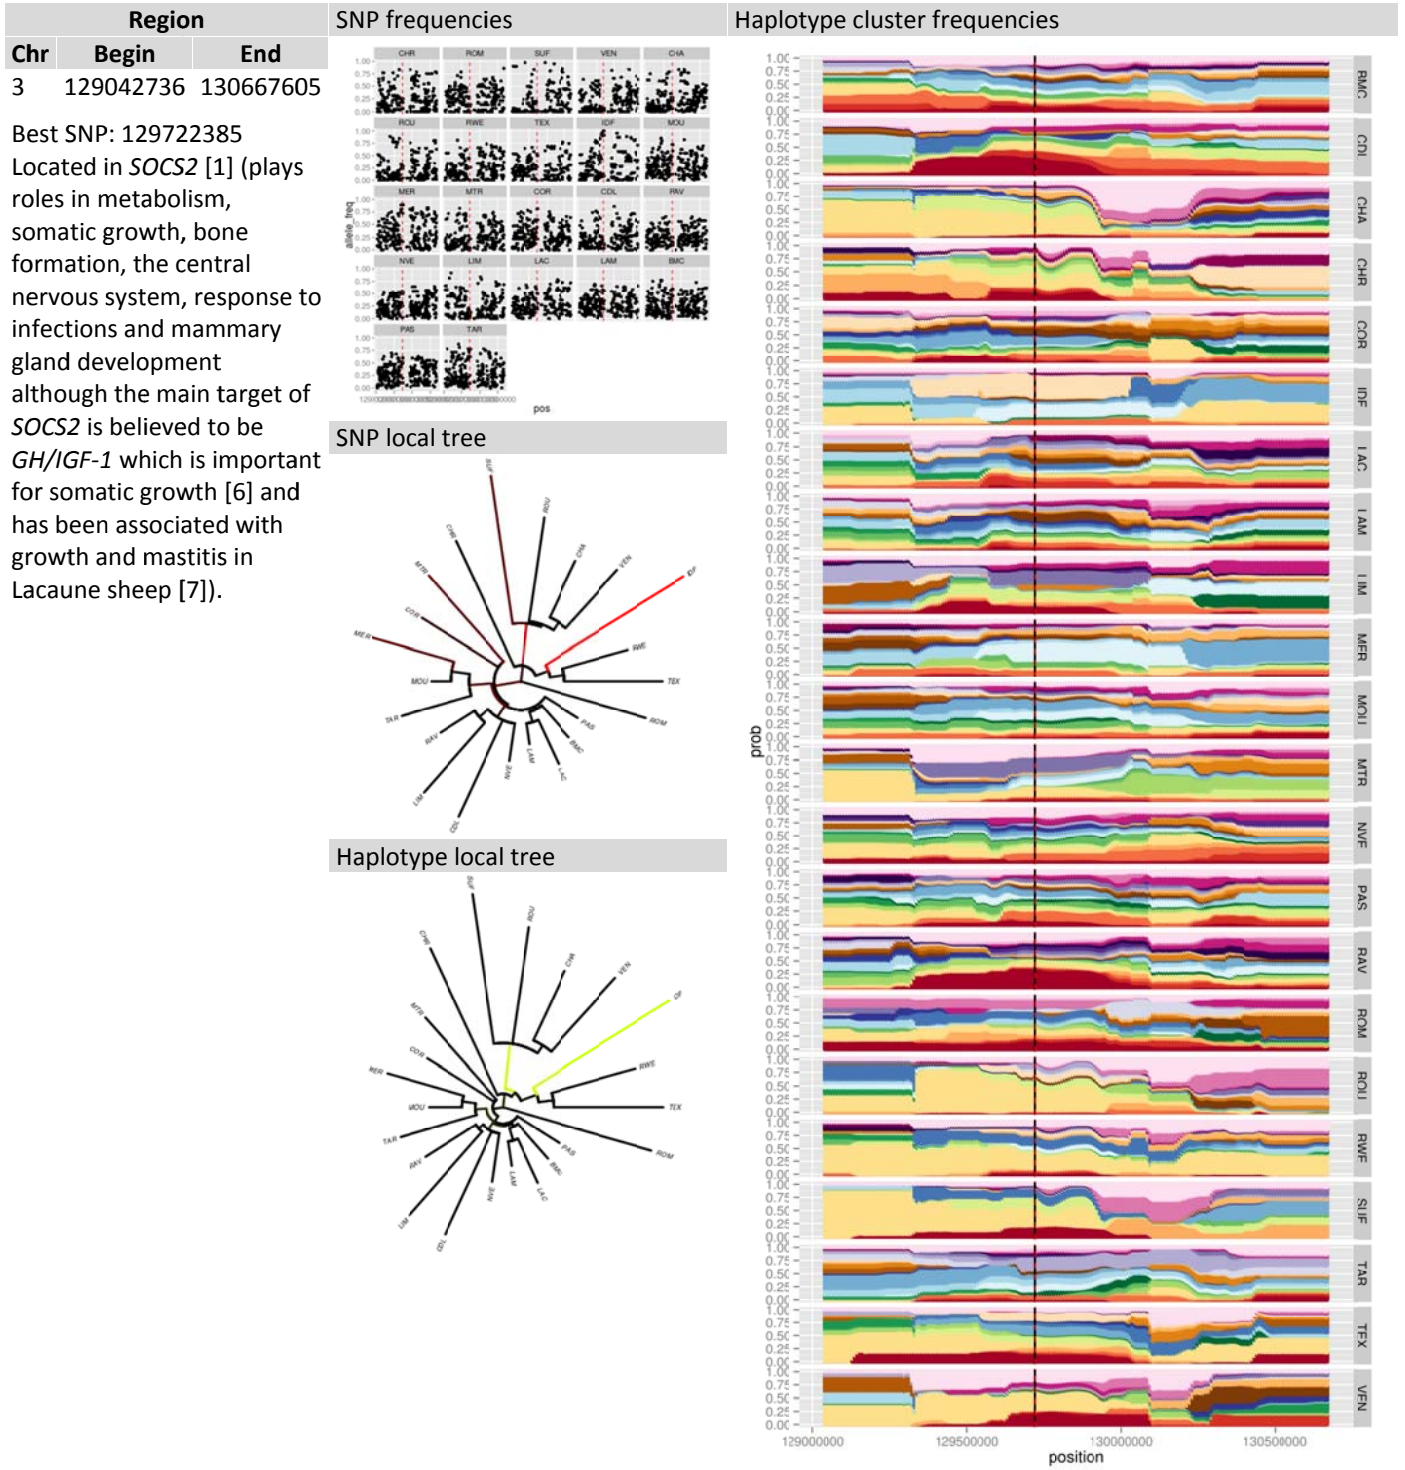

| Region |           |           |
|--------|-----------|-----------|
| Chr    | Begin     | End       |
| 3      | 153596226 | 154607238 |

Best SNP: 154214608  
Candidate gene: *MSRB3*  
(associated with ear position in dogs [8] and ear size in pigs [9]).

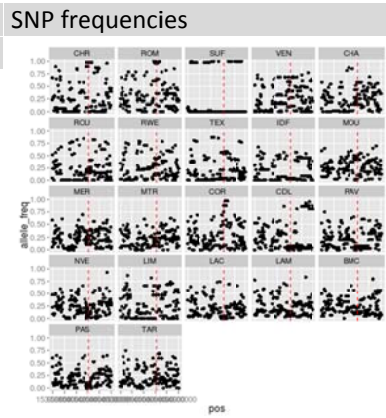

SNP local tree

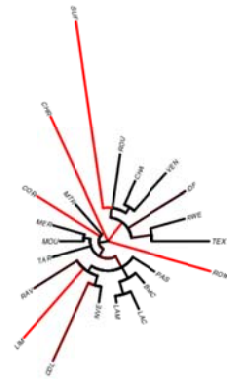

Haplotype local tree

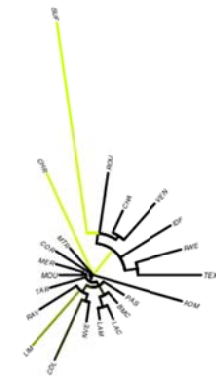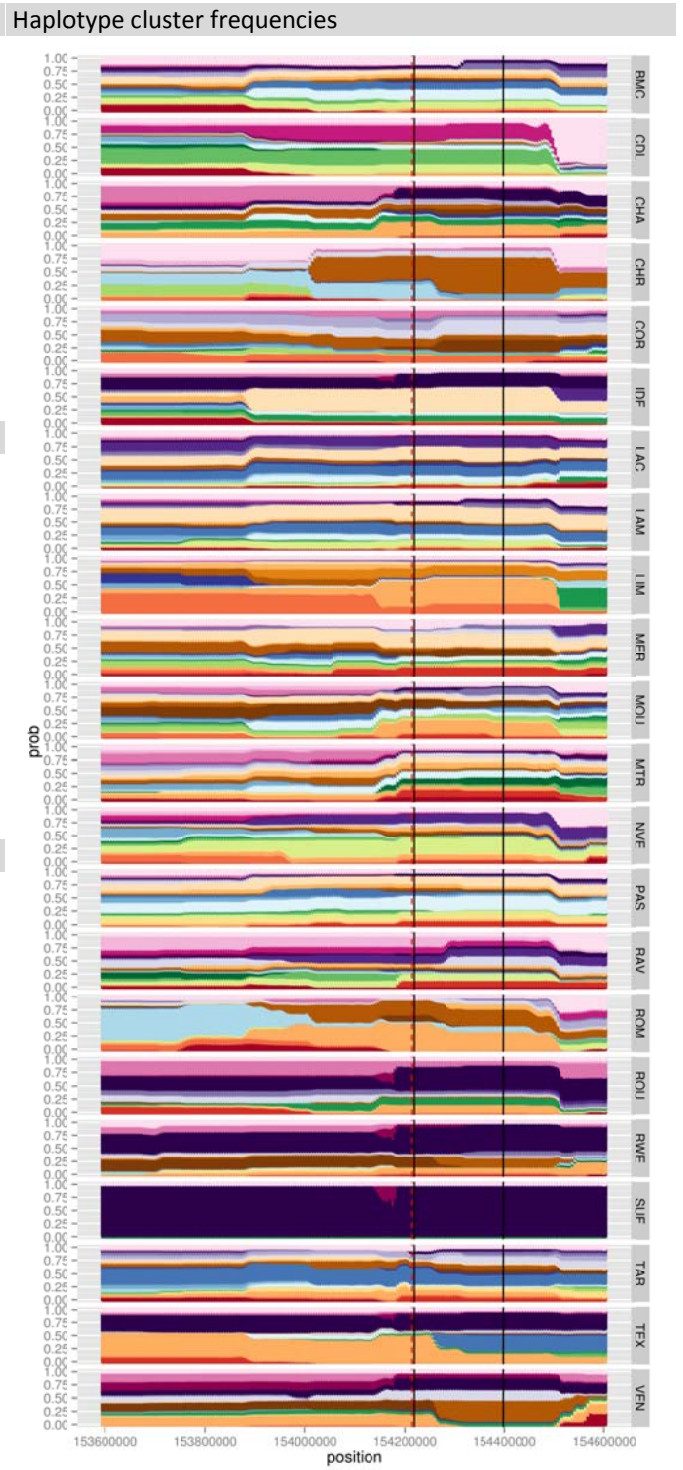

| Region |           |           |
|--------|-----------|-----------|
| Chr    | Begin     | End       |
| 3      | 209486703 | 211328458 |

Best SNP: 210938692  
 Located in *FKBP4* [1].

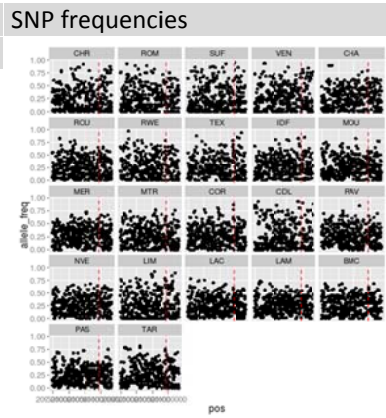

SNP local tree

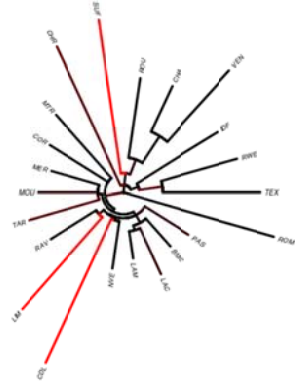

Haplotype local tree

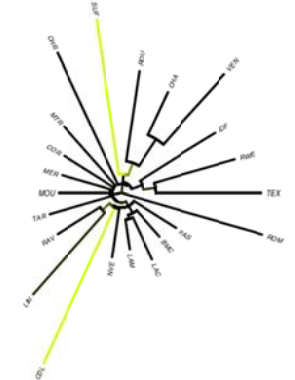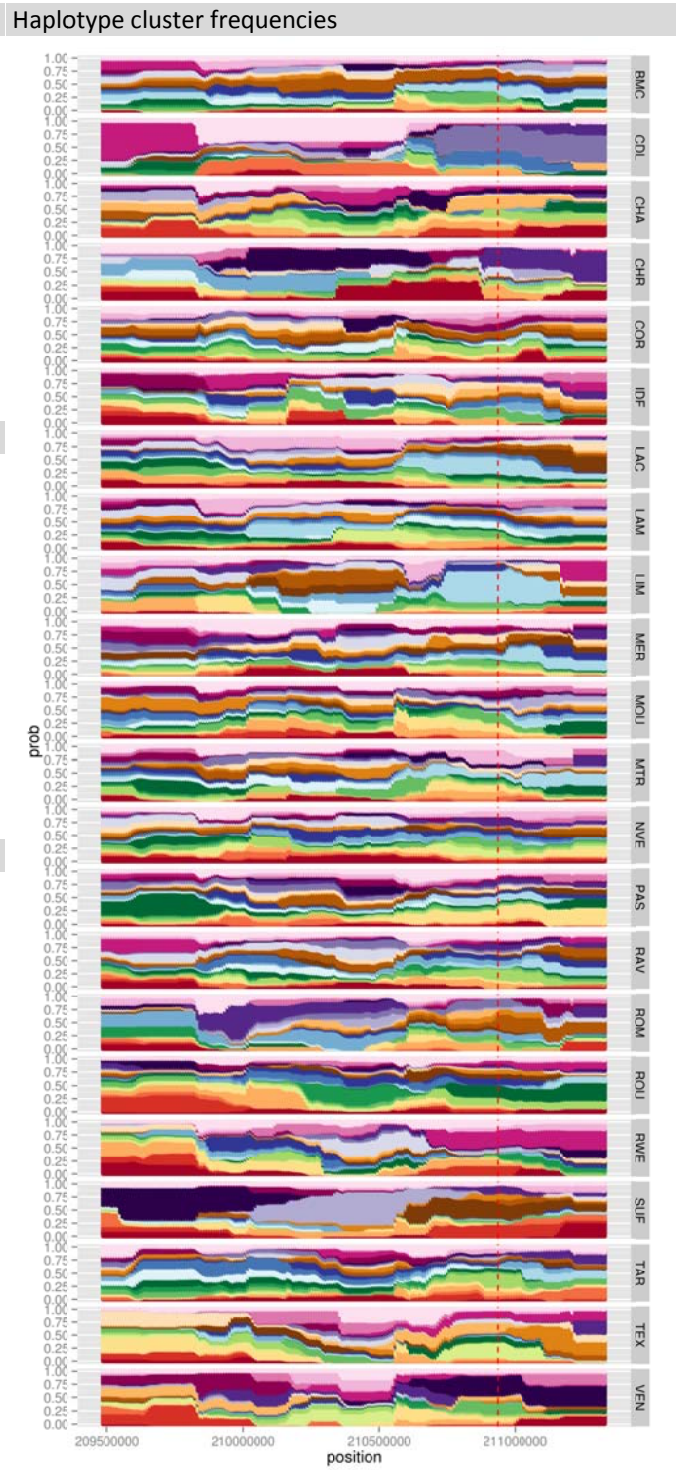





| Region |          |          |
|--------|----------|----------|
| Chr    | Begin    | End      |
| 6      | 26112692 | 47828792 |

Best SNP: 35762202  
 Located in *FAM13A* [1].  
 Candidate genes: *ABCG2*  
 (associated with milk production in sheep [10])  
 and *NCAPG2/LCORL*  
 (associated with height in cattle [11]) outlined in black.

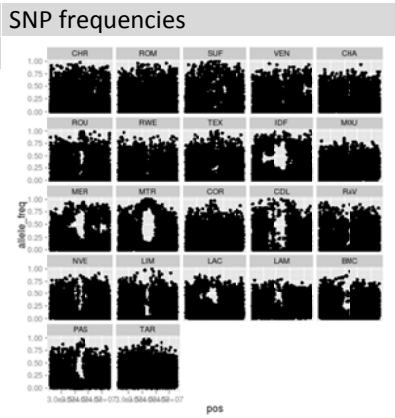

SNP local tree

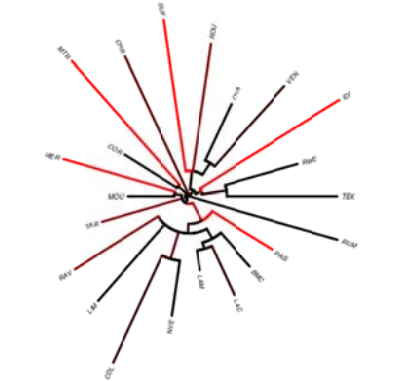

Haplotype local tree

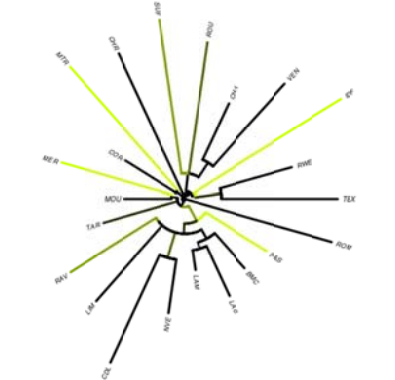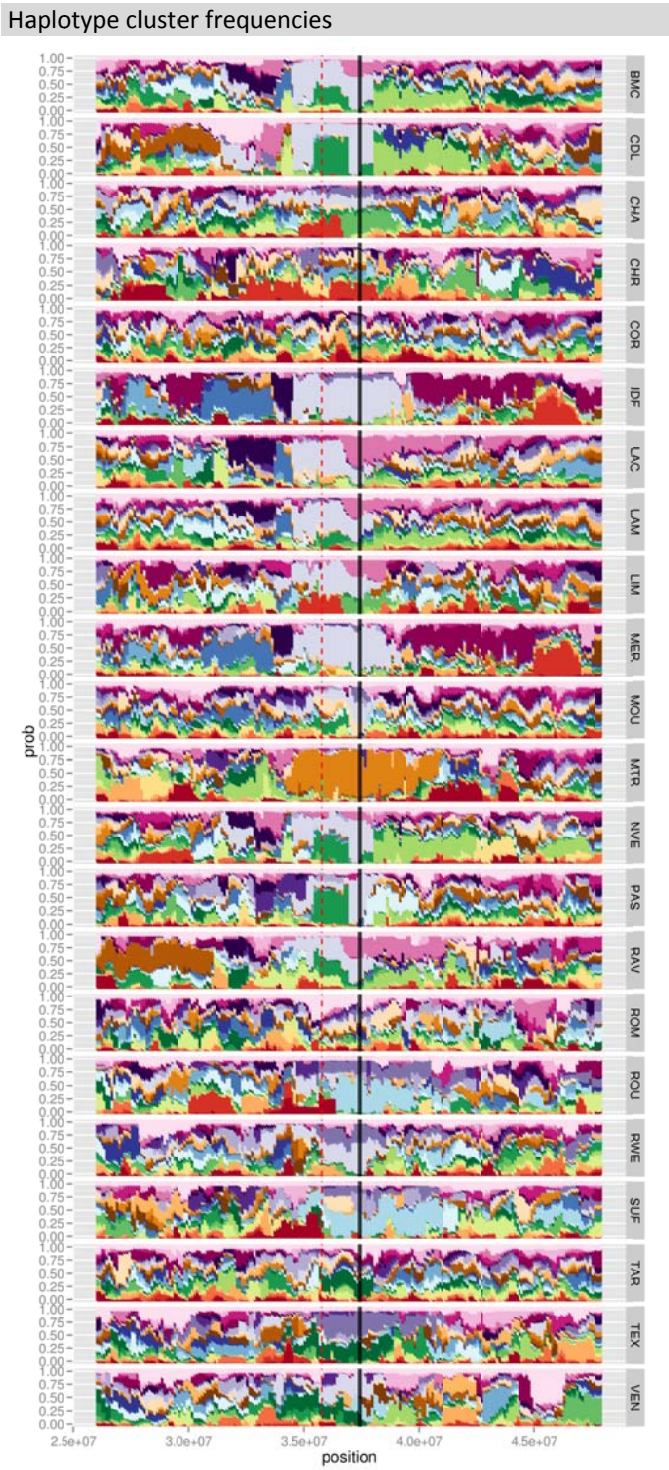

| Region             |          |          |
|--------------------|----------|----------|
| Chr                | Begin    | End      |
| 6                  | 57693565 | 59301412 |
| Best SNP: 59252594 |          |          |

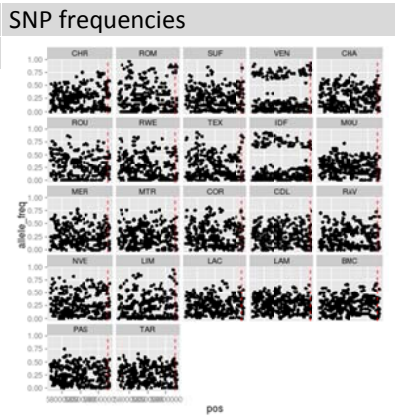

SNP local tree

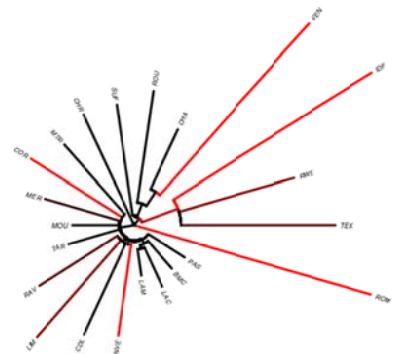

Haplotype local tree

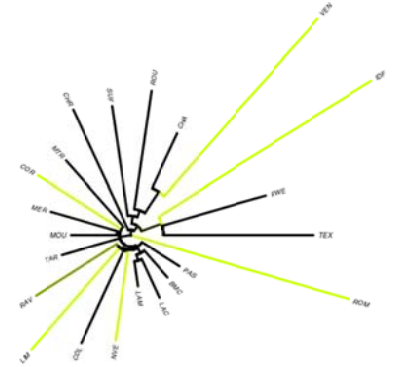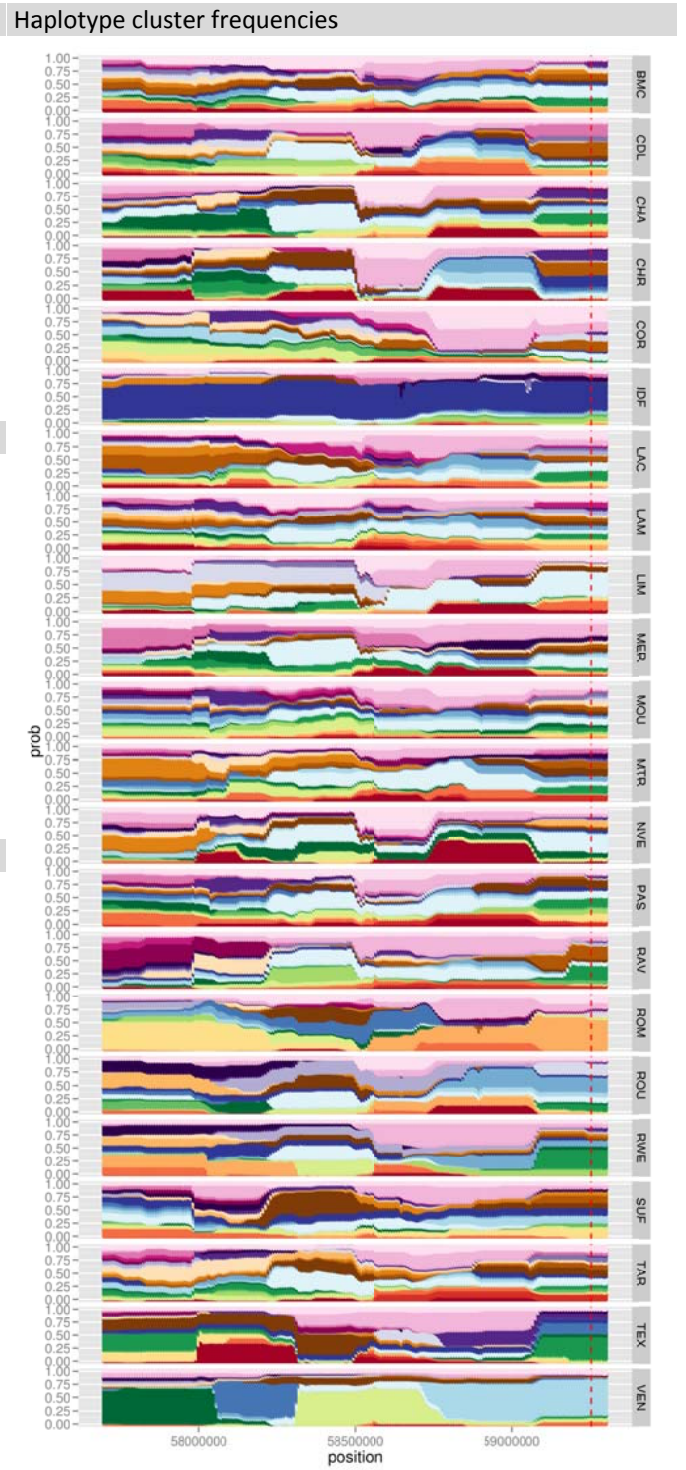

| Region |          |          |
|--------|----------|----------|
| Chr    | Begin    | End      |
| 6      | 94242119 | 96008214 |

Best SNP: 95193314  
 Located in *C4orf22* [1].

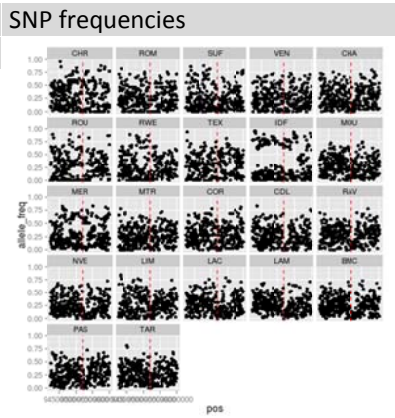

SNP local tree

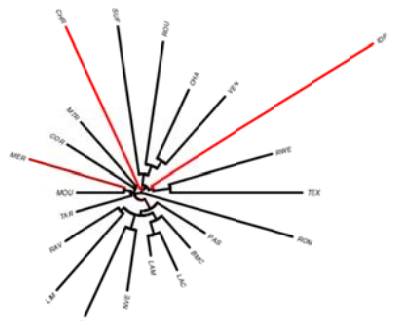

Haplotype local tree

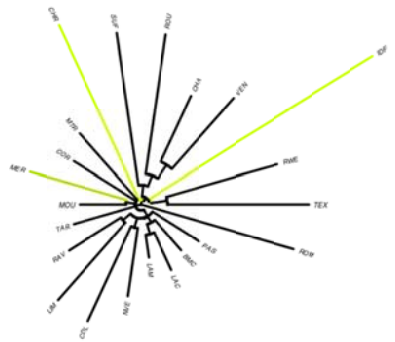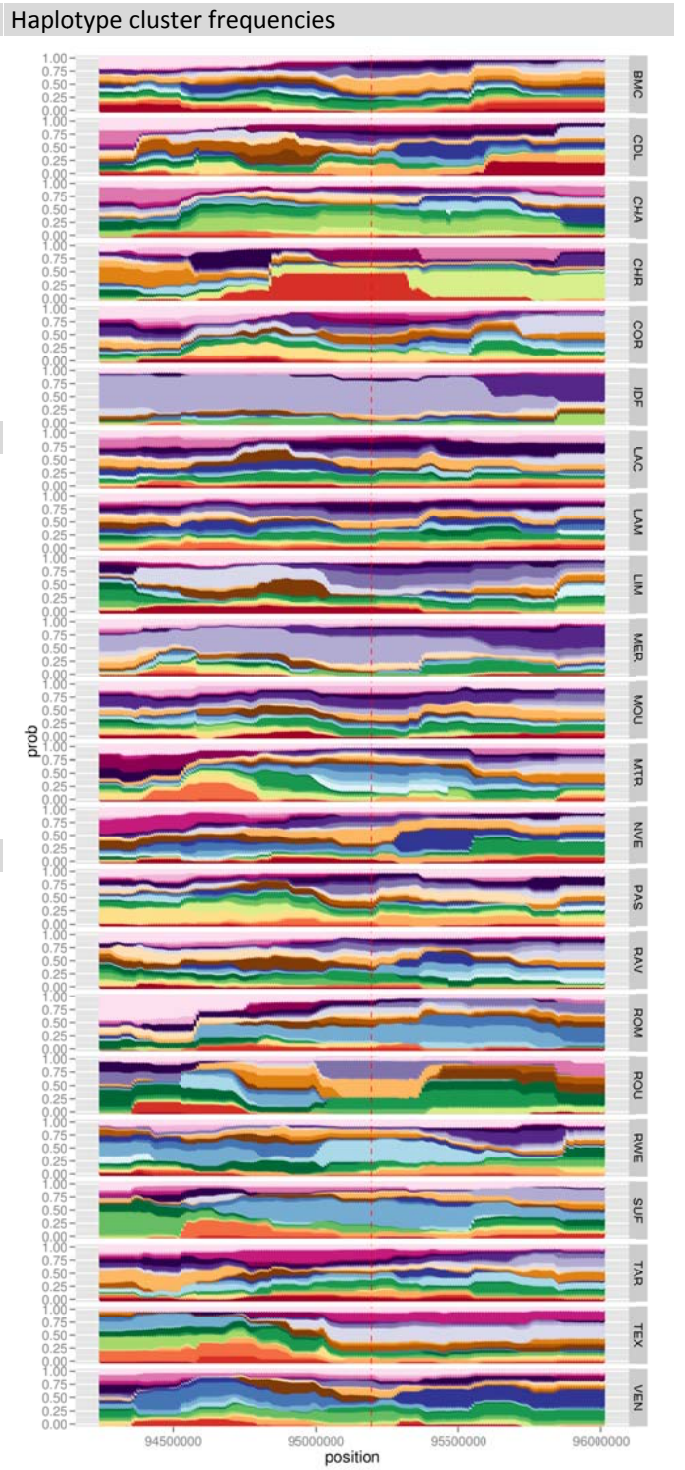

| Region |       |     | SNP frequencies | Haplotype cluster frequencies |
|--------|-------|-----|-----------------|-------------------------------|
| Chr    | Begin | End |                 |                               |

8 30158735 32611917

Best SNP: 31402984

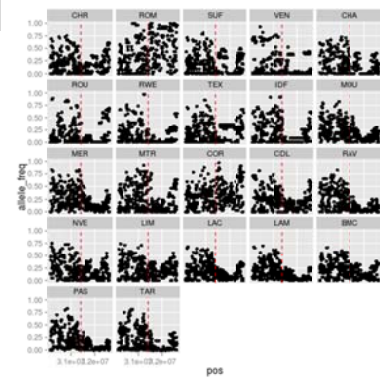

SNP local tree

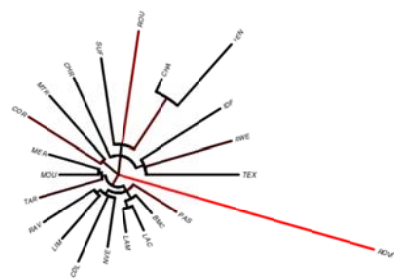

Haplotype local tree

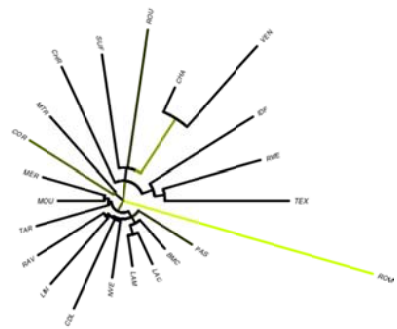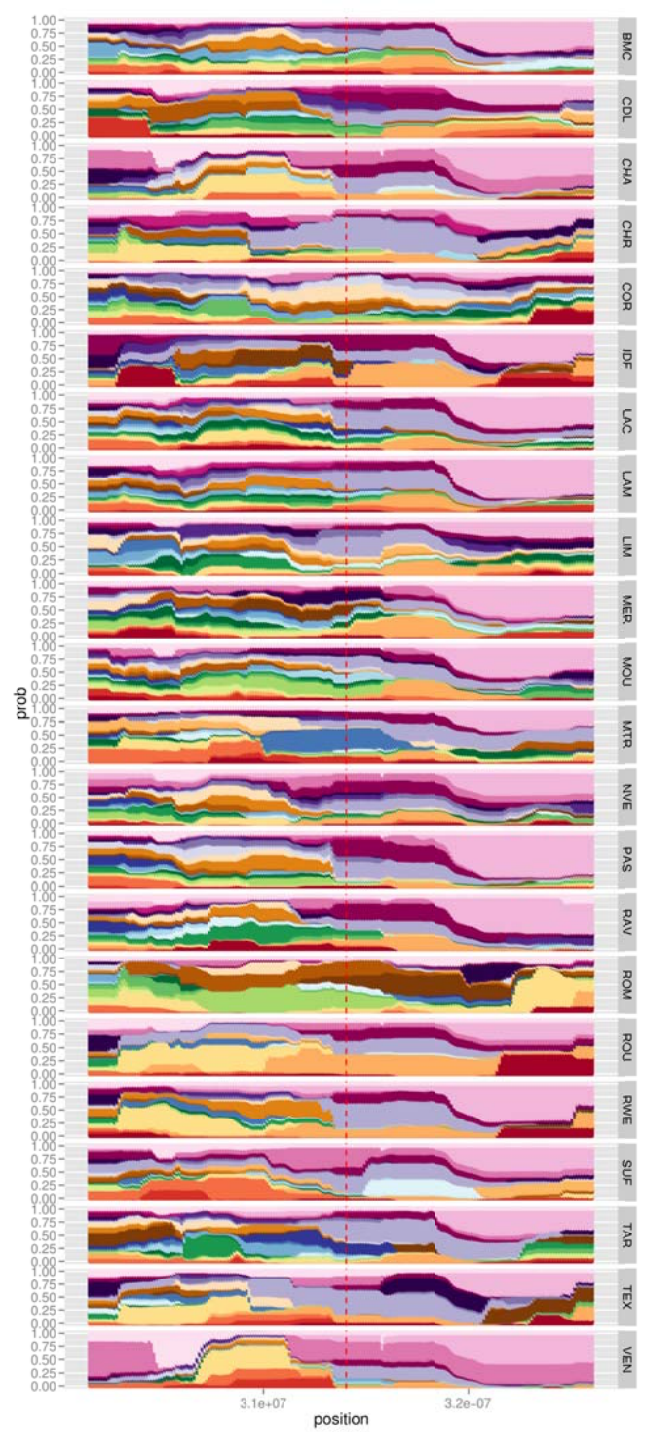

| Region |          |          |
|--------|----------|----------|
| Chr    | Begin    | End      |
| 8      | 80676681 | 83105269 |

Best SNP: 80707878  
 Located in *zdhhc14* [1].

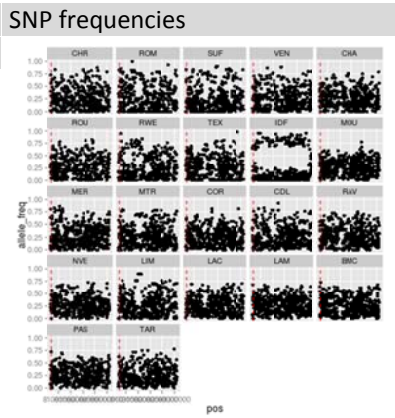

SNP local tree

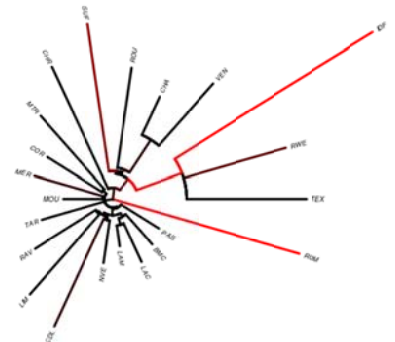

Haplotype local tree

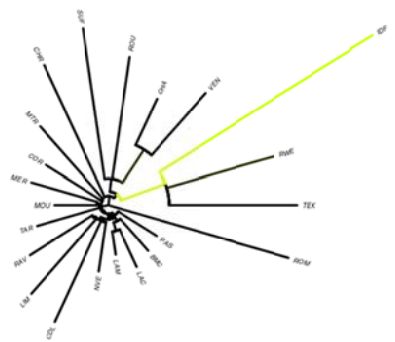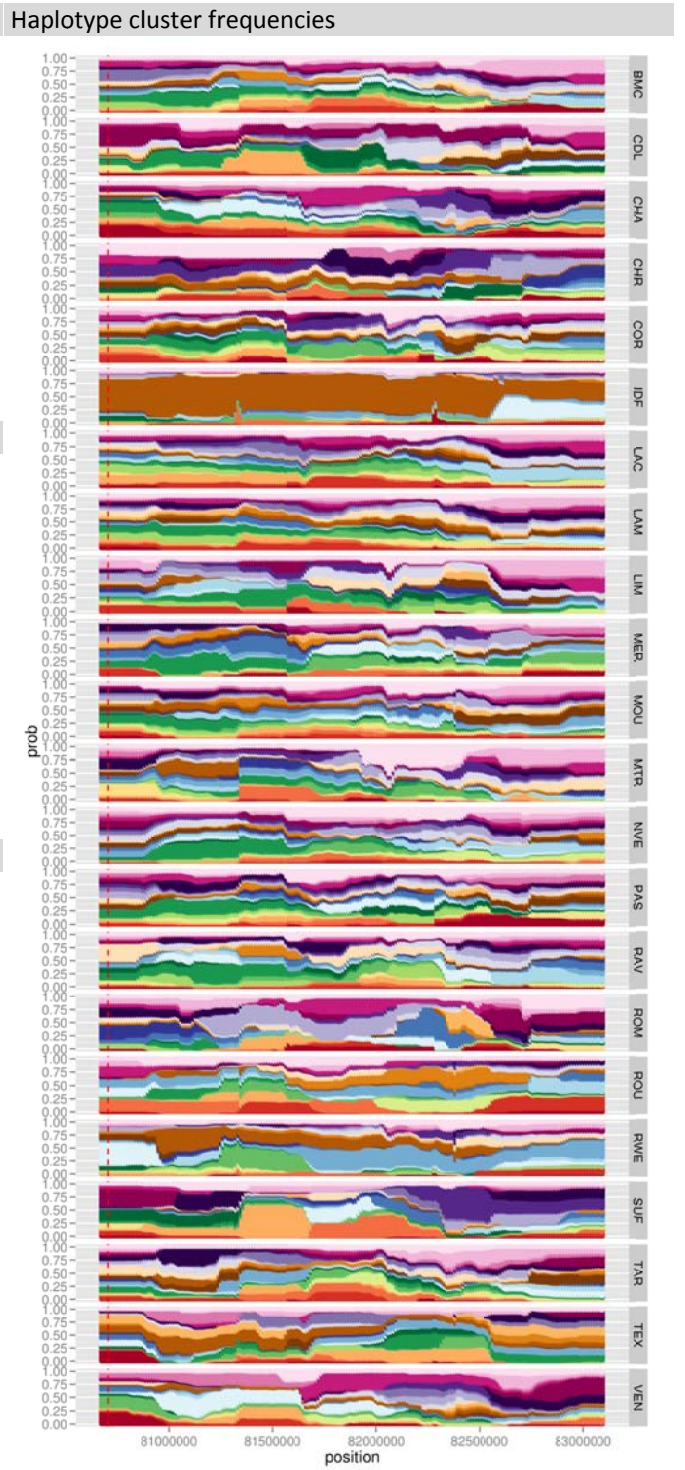

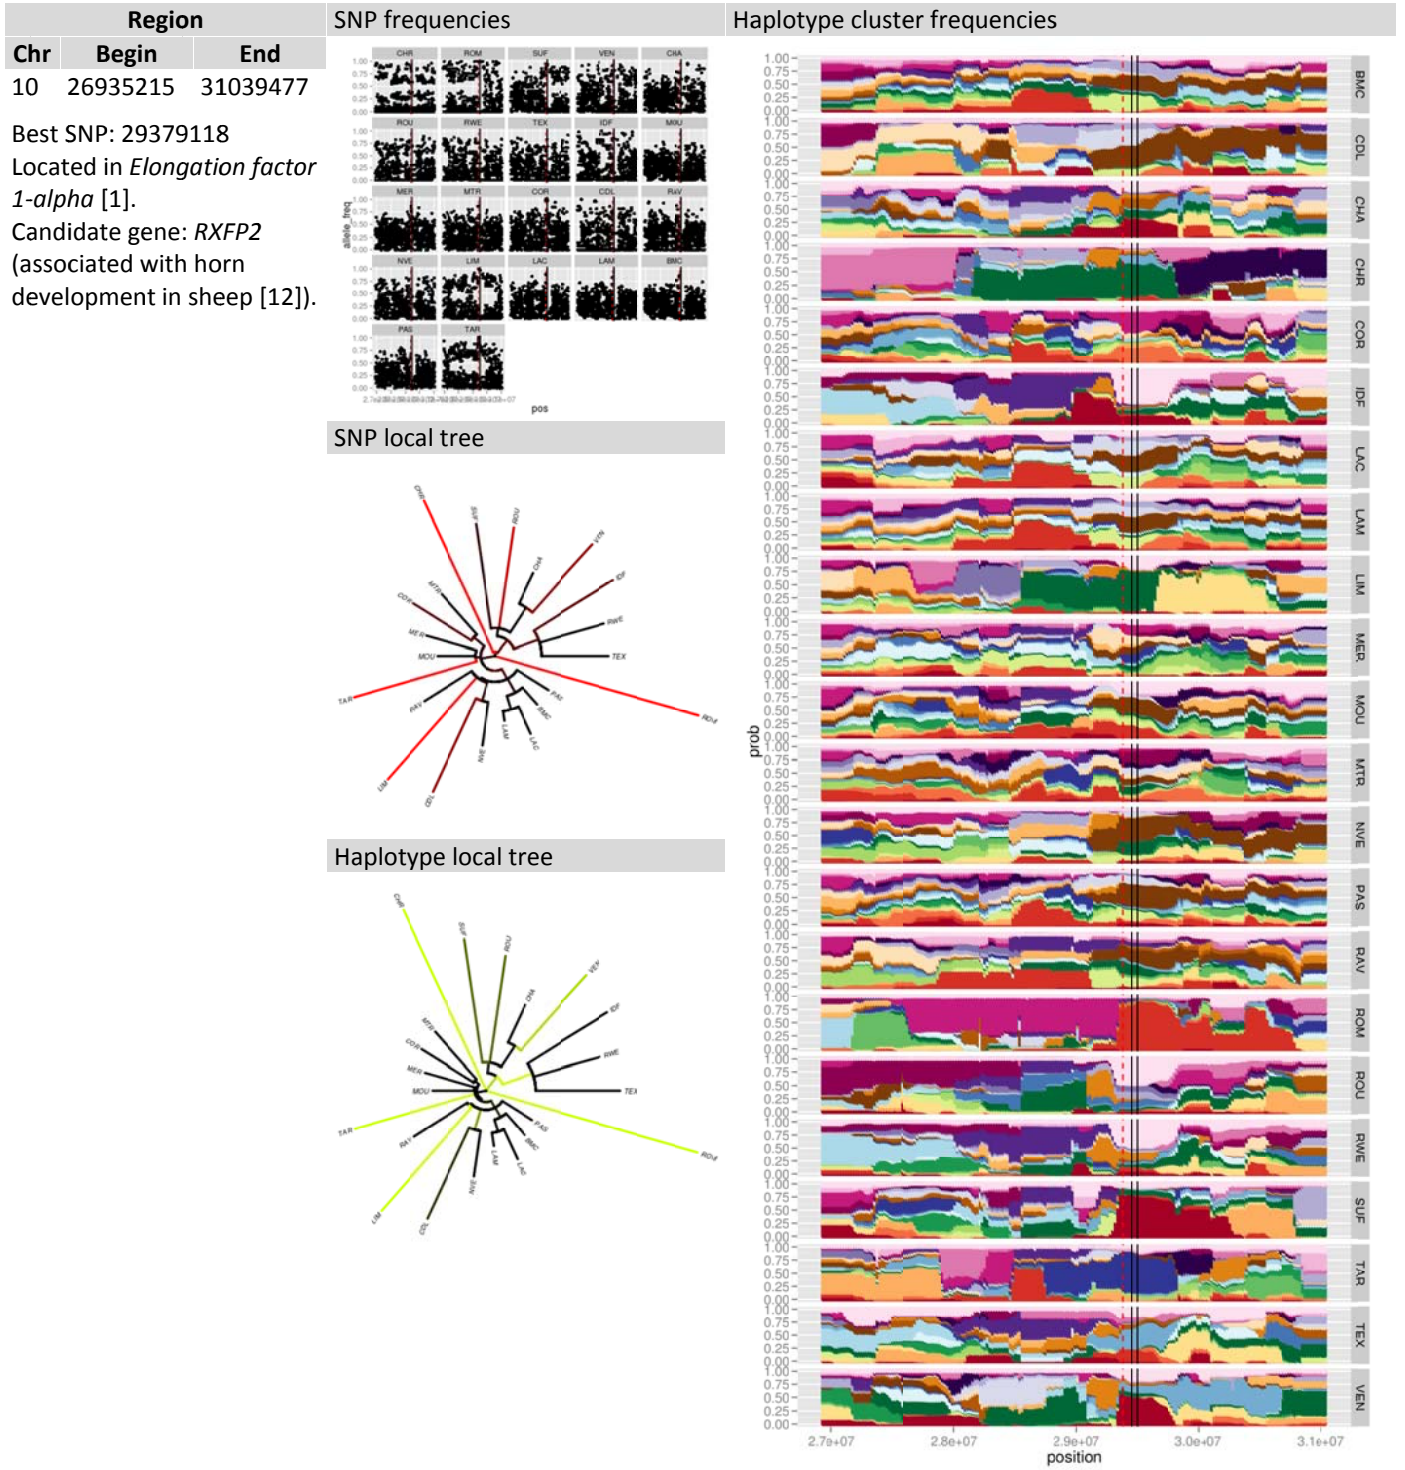

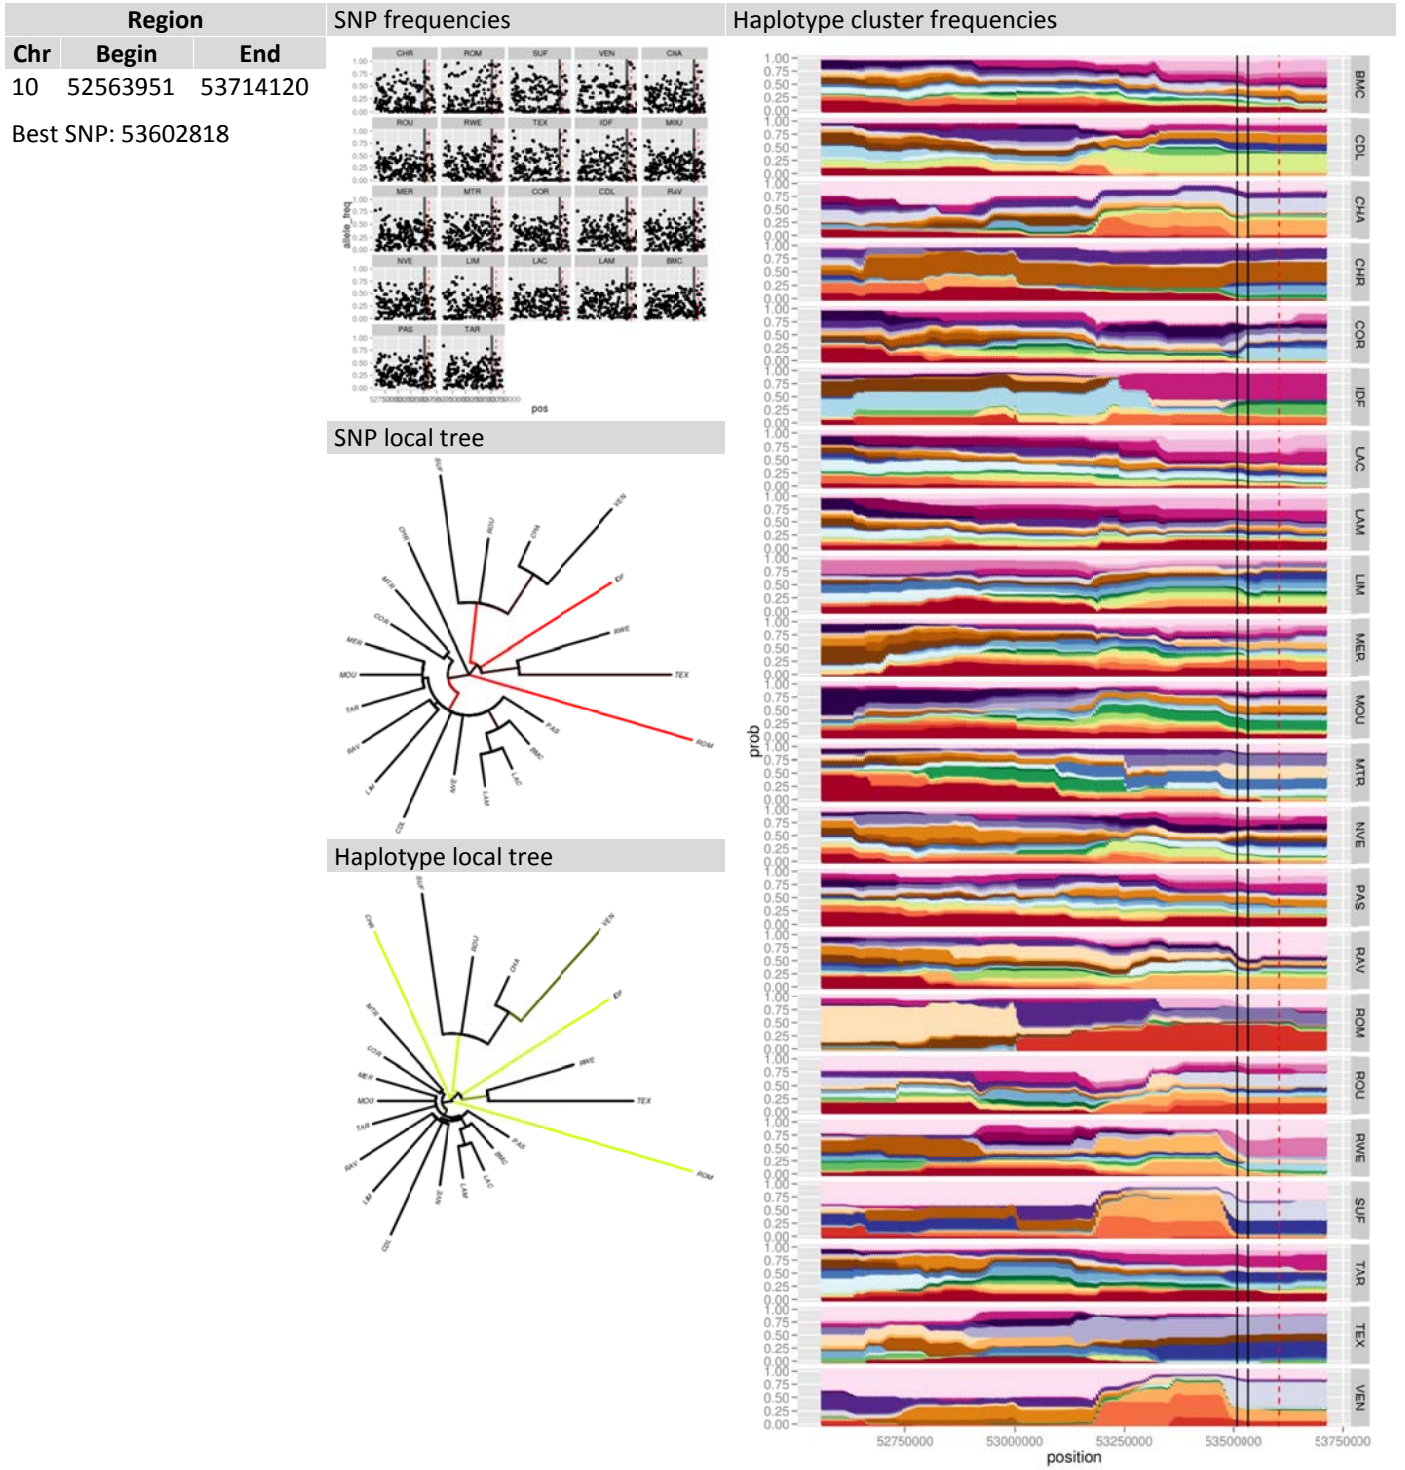

| Region |          |          |
|--------|----------|----------|
| Chr    | Begin    | End      |
| 11     | 25369914 | 27740997 |

Best SNP: 26333173  
 Located in *ALOX12* [1].

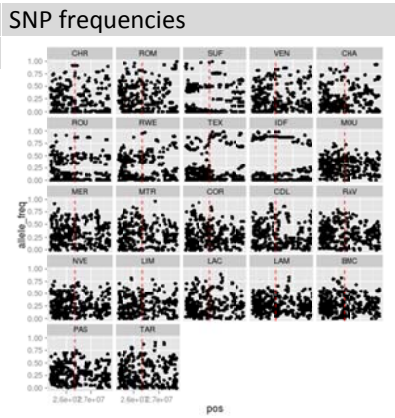

SNP local tree

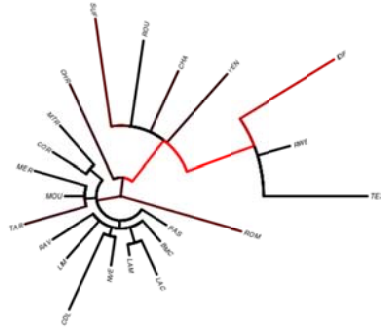

Haplotype local tree

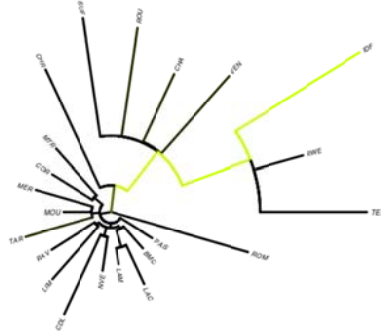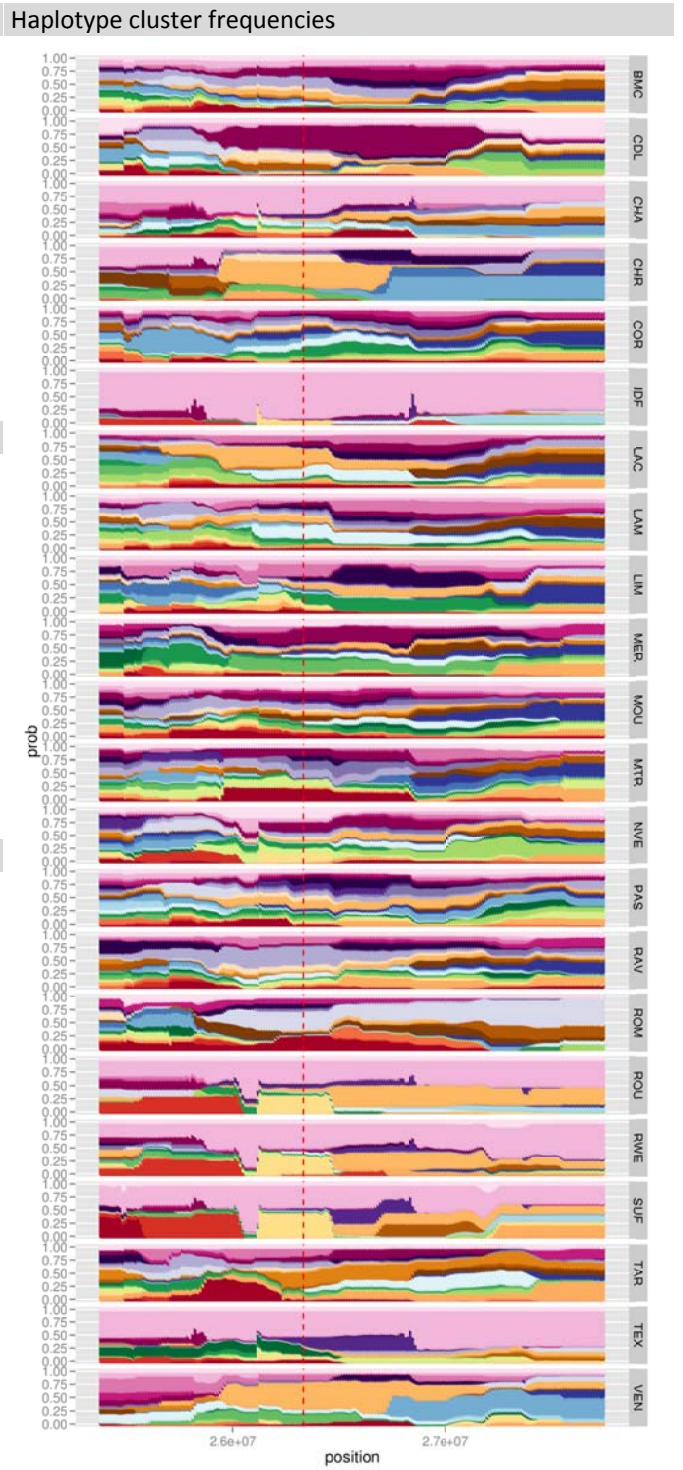



| Region |  |  | SNP frequencies | Haplotype cluster frequencies |
|--------|--|--|-----------------|-------------------------------|
|--------|--|--|-----------------|-------------------------------|

| Chr | Begin    | End      |
|-----|----------|----------|
| 13  | 34108089 | 37740655 |

Best SNP: 37524442

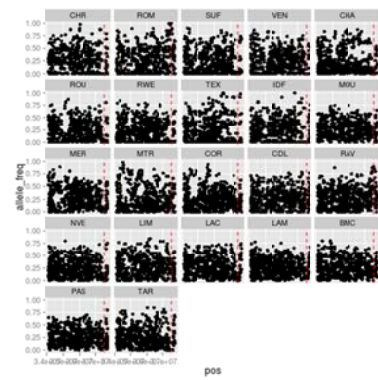

SNP local tree

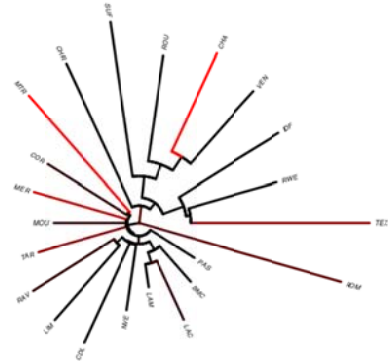

Haplotype local tree

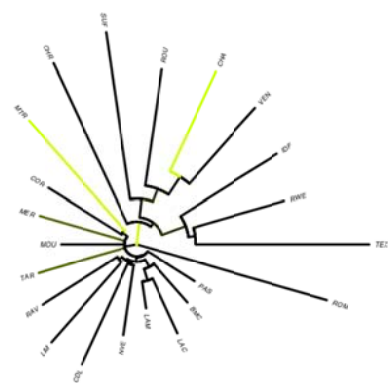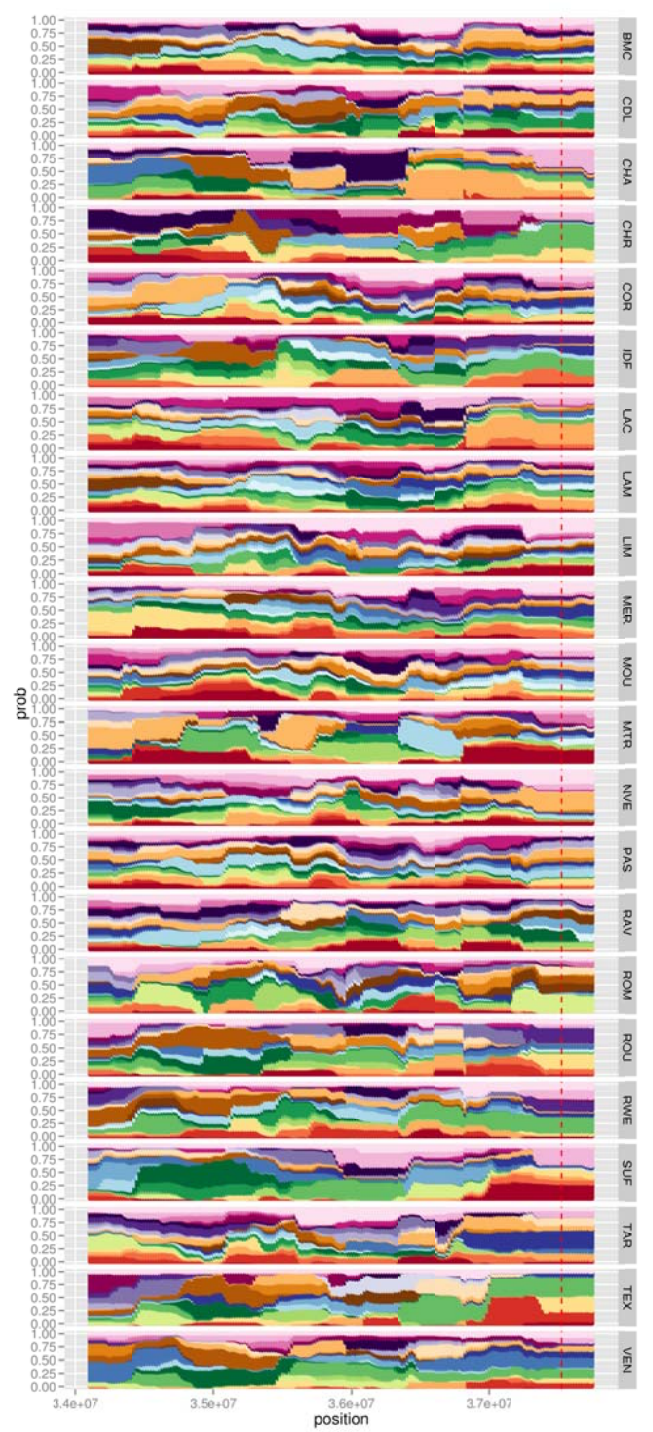

| Region |          |          |
|--------|----------|----------|
| Chr    | Begin    | End      |
| 13     | 38955039 | 48646582 |

Best SNP: 46759682  
 Located in *pcna* [1].

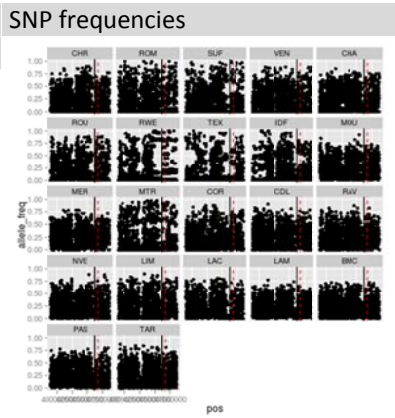

SNP local tree

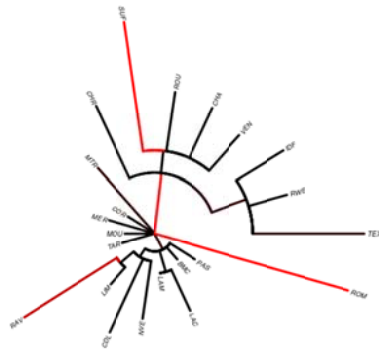

Haplotype local tree

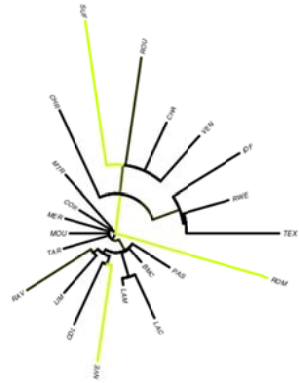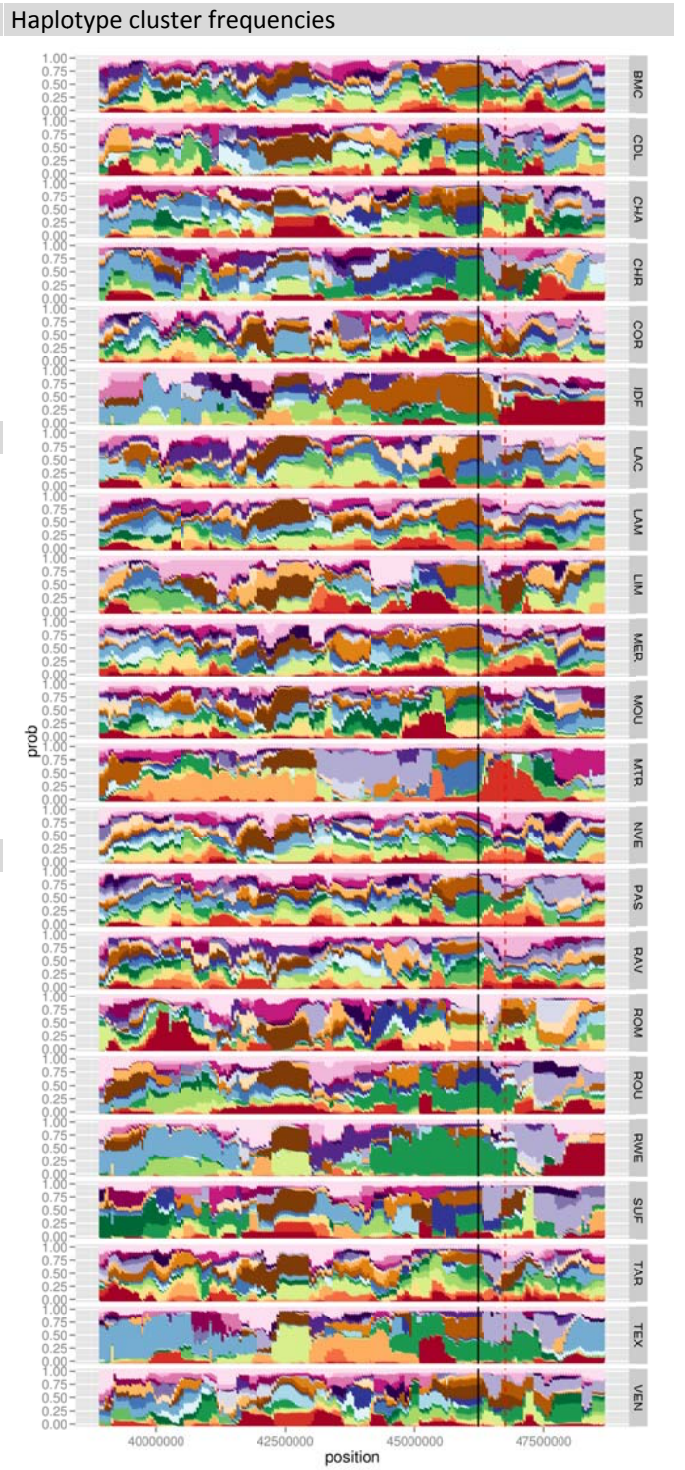

| Region |          |          |
|--------|----------|----------|
| Chr    | Begin    | End      |
| 13     | 51357557 | 56499047 |

Best SNP: 56389183  
 Located in candidate gene *EDN3* [1] (involved in melanocyte development and differentiation [13]).

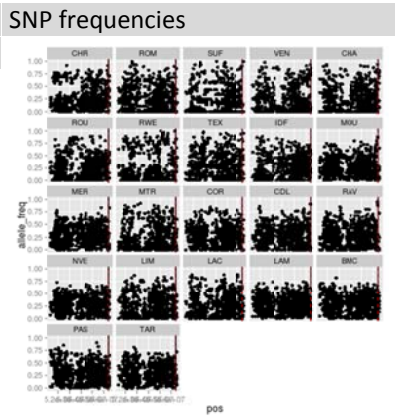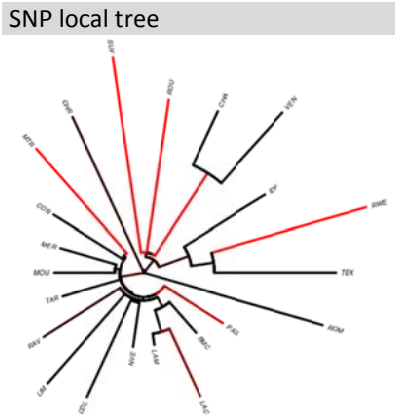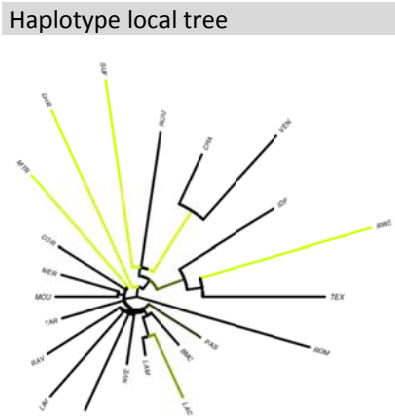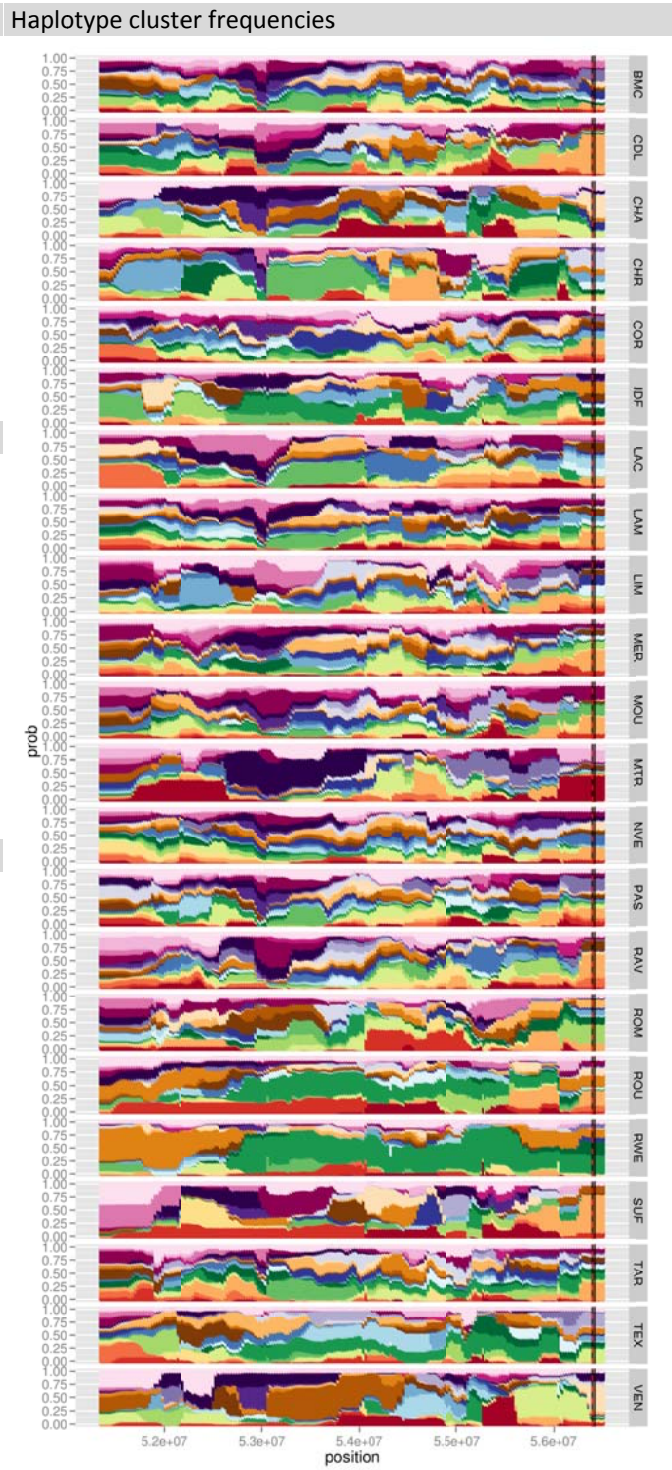

| Region |          |          |
|--------|----------|----------|
| Chr    | Begin    | End      |
| 13     | 61688330 | 65155663 |

Best SNP: 62839711  
 Located in *RALY* [1].  
 Candidate gene: *ASIP*  
 (involved in melanin production [14]).

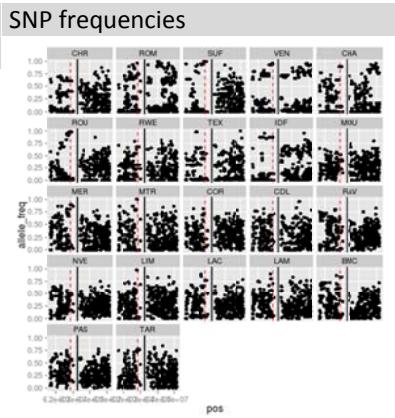

SNP local tree

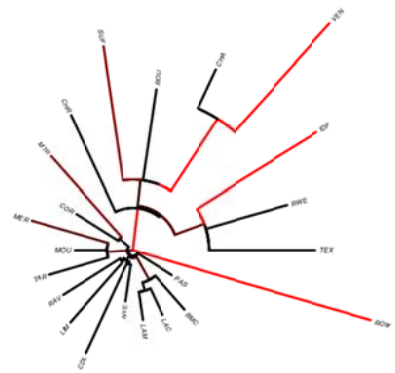

Haplotype local tree

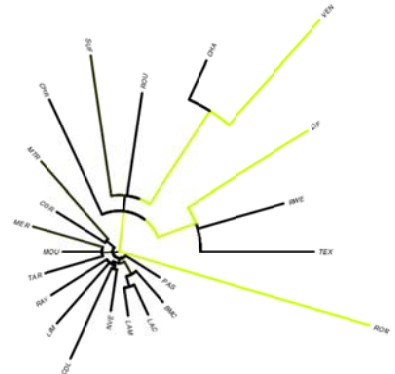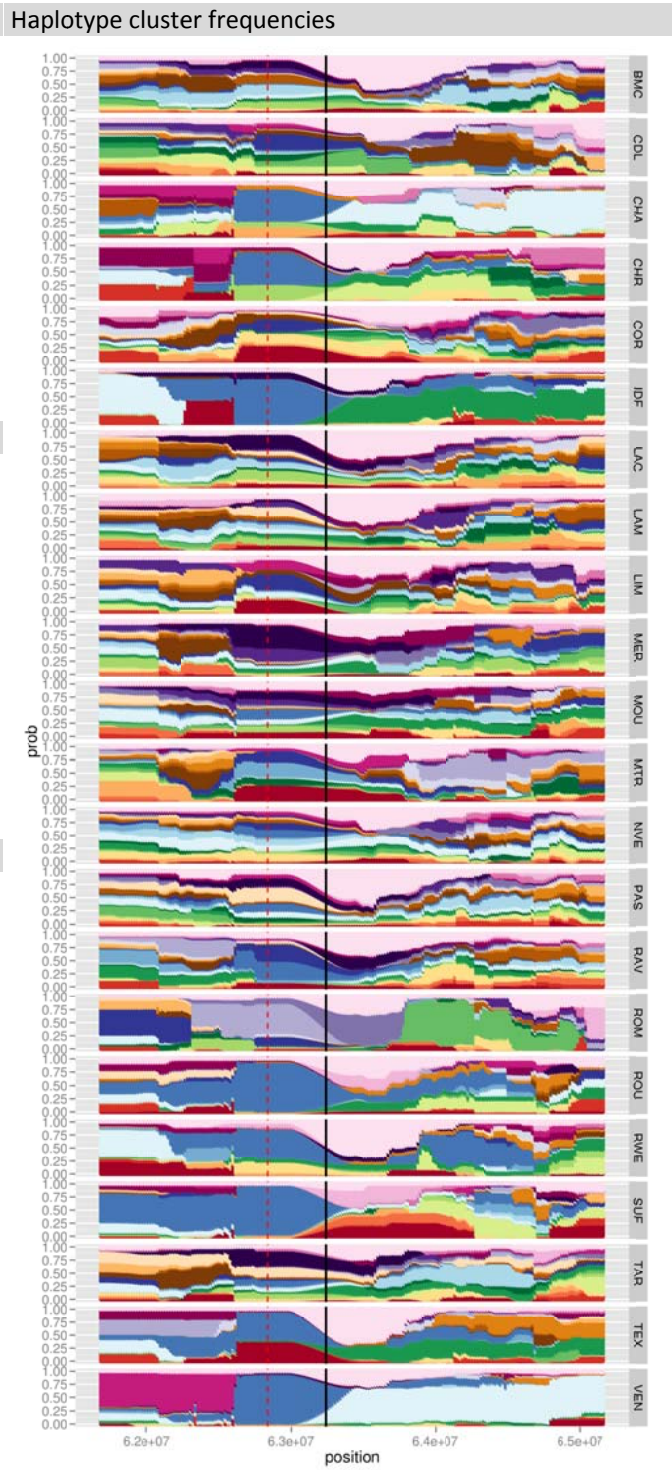

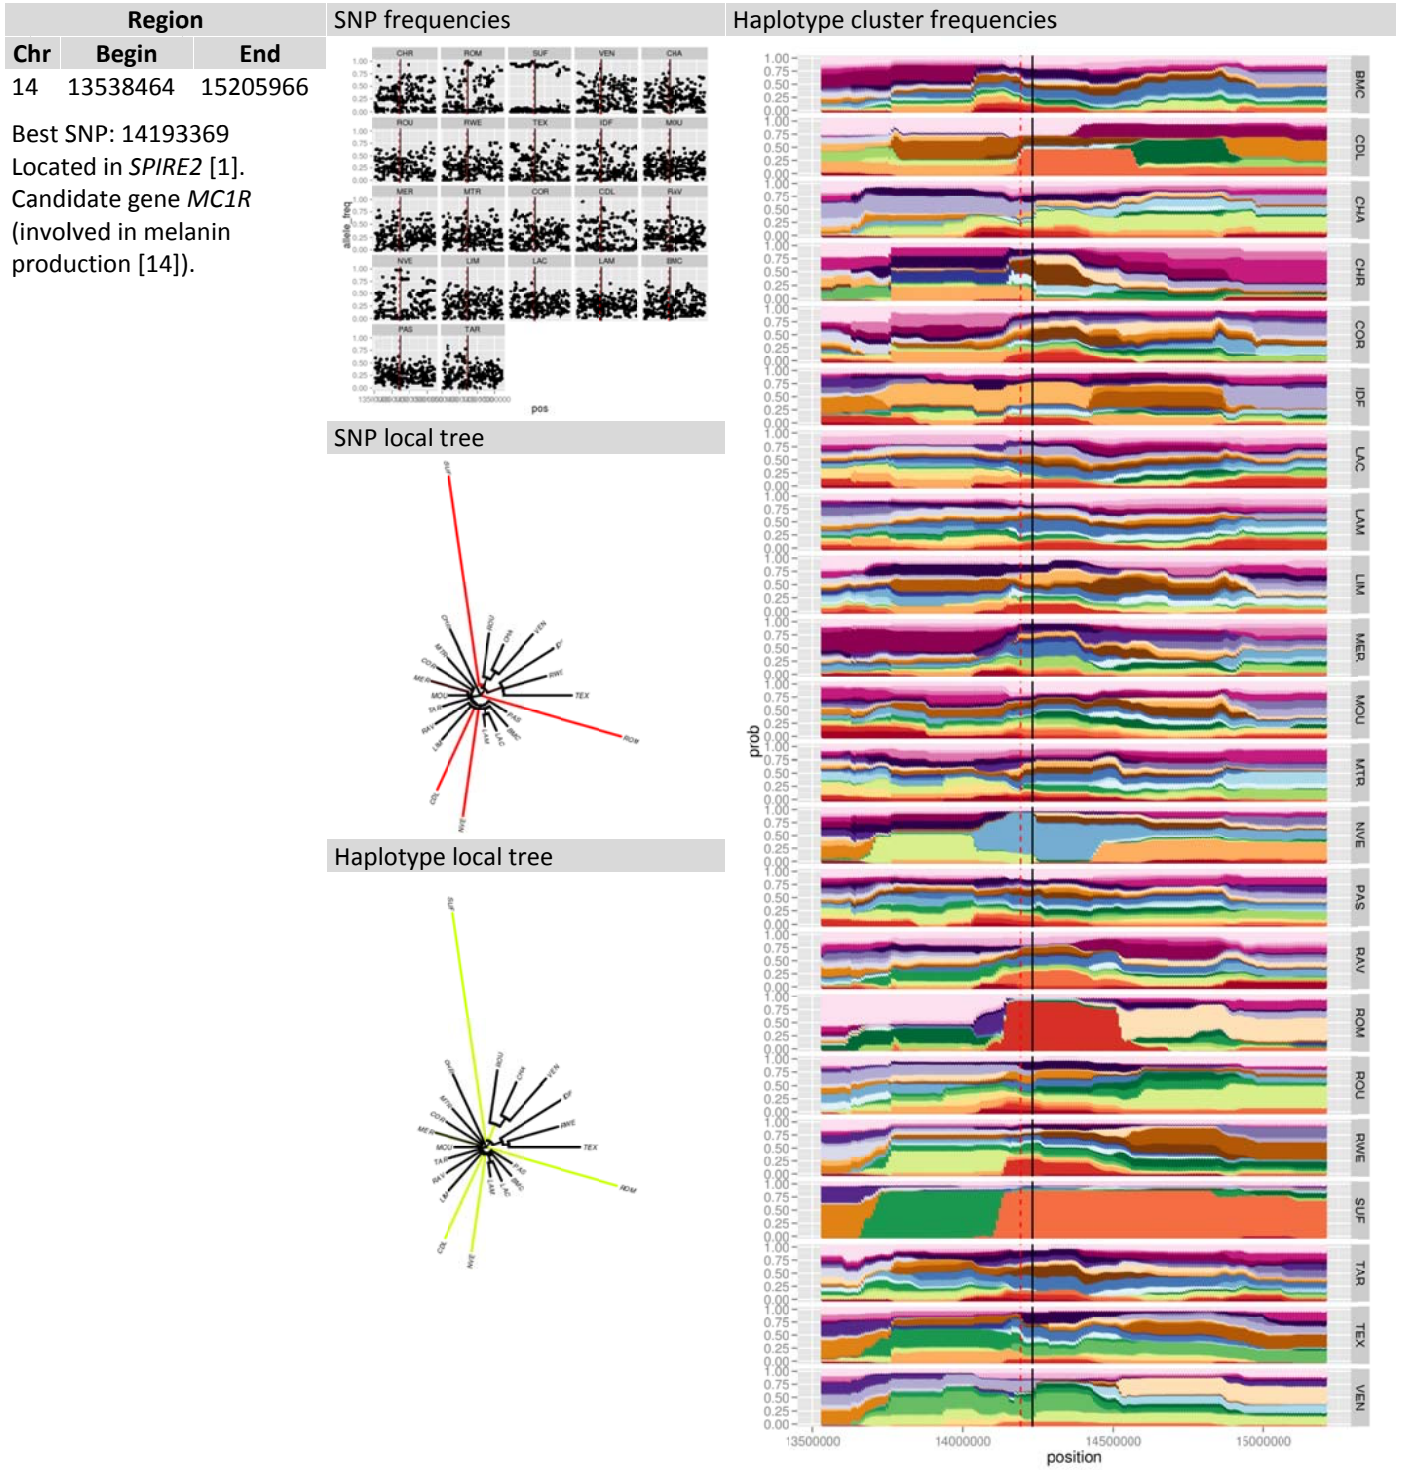

| Region |  |  | SNP frequencies | Haplotype cluster frequencies |
|--------|--|--|-----------------|-------------------------------|
|--------|--|--|-----------------|-------------------------------|

| Chr | Begin    | End      |
|-----|----------|----------|
| 14  | 24961598 | 26974355 |

Best SNP: 26000318

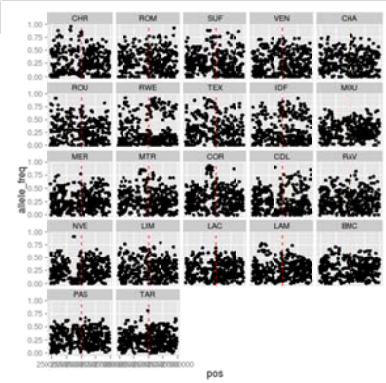

SNP local tree

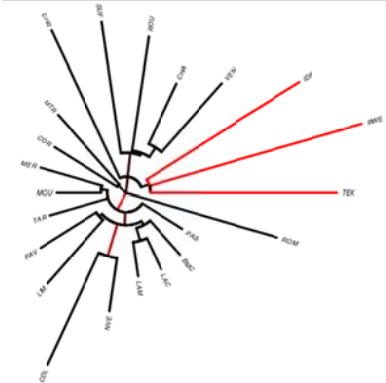

Haplotype local tree

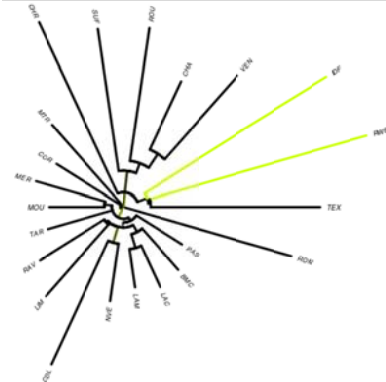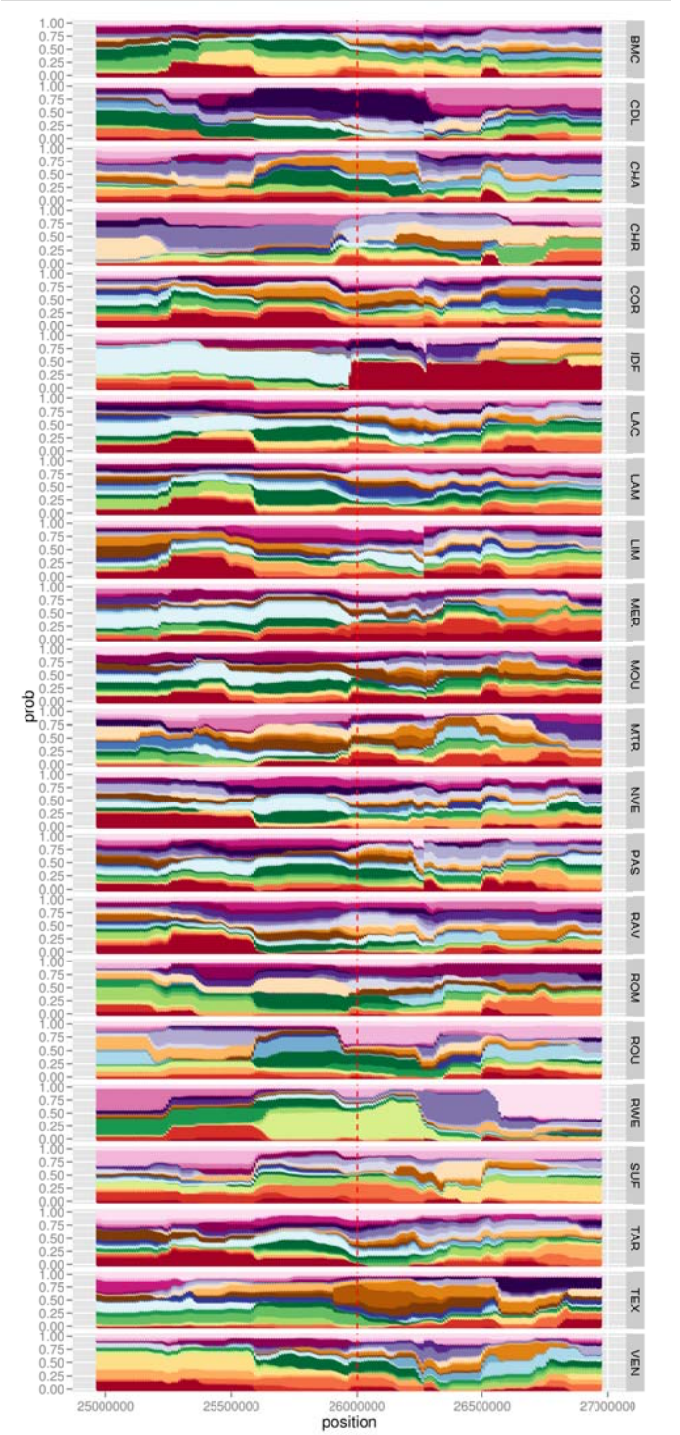

| Region |          |          |
|--------|----------|----------|
| Chr    | Begin    | End      |
| 14     | 51491696 | 52169340 |

Best SNP: 51634415  
 Located in *BCAM* [1].

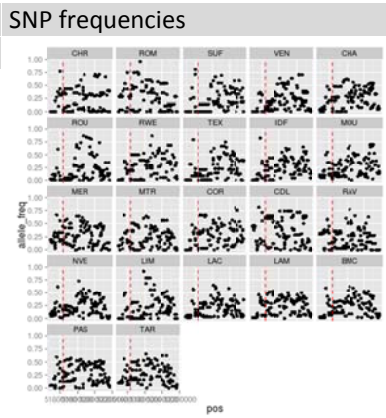

SNP local tree

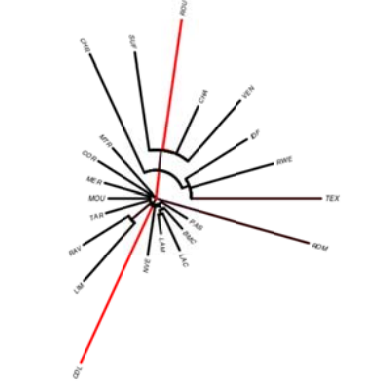

Haplotype local tree

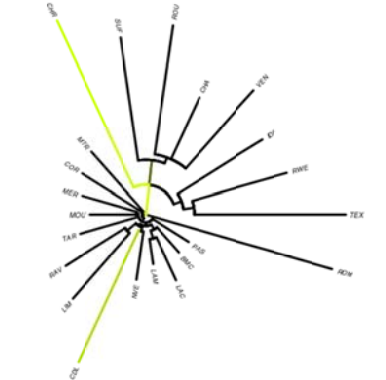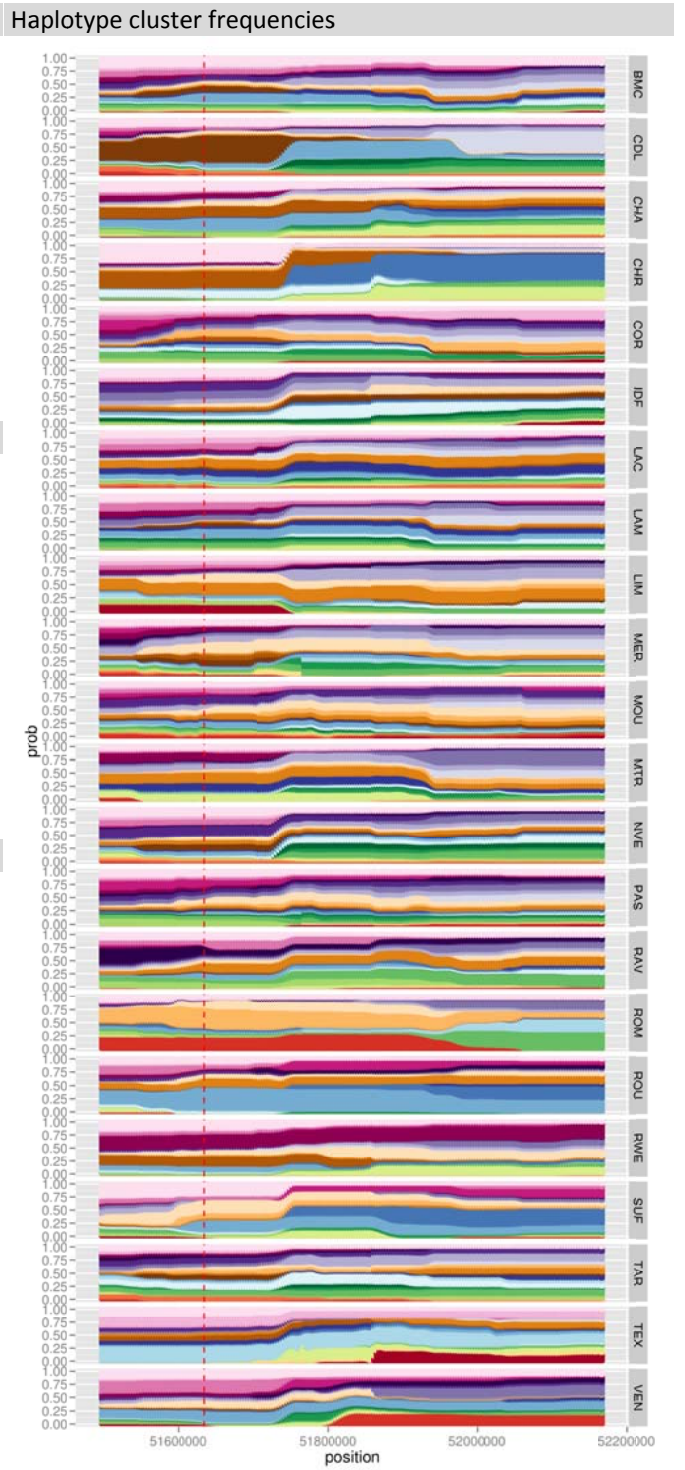

| Region |          |          |
|--------|----------|----------|
| Chr    | Begin    | End      |
| 14     | 54580893 | 56319878 |

Best SNP: 55094151  
 Located in *IRF3* [1].

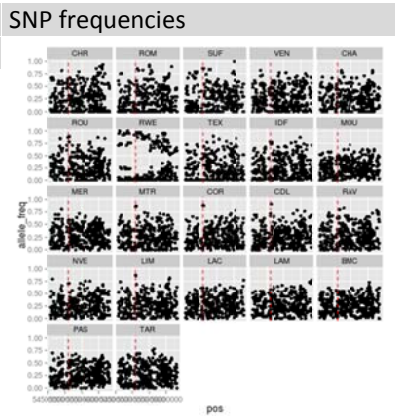

SNP local tree

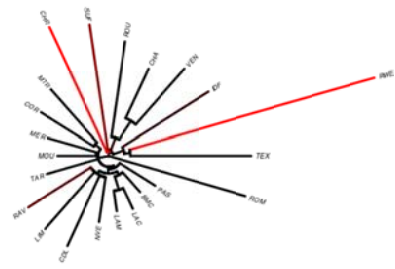

Haplotype local tree

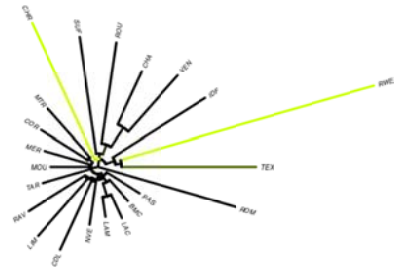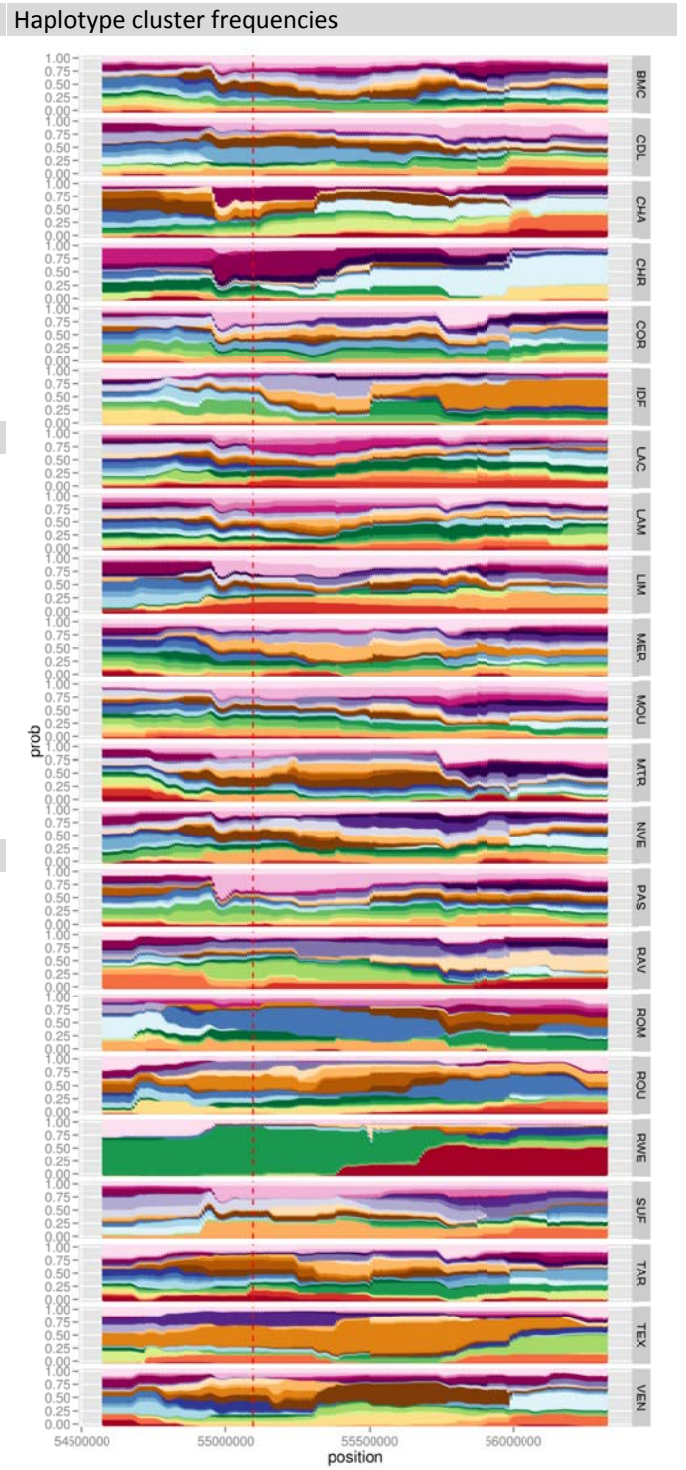



| Region |          |          |
|--------|----------|----------|
| Chr    | Begin    | End      |
| 15     | 71351365 | 72991175 |

Best SNP: 72735040  
Candidate genes: *ALX4* and *EXT2* (involved in limb and skeletal development [15]).

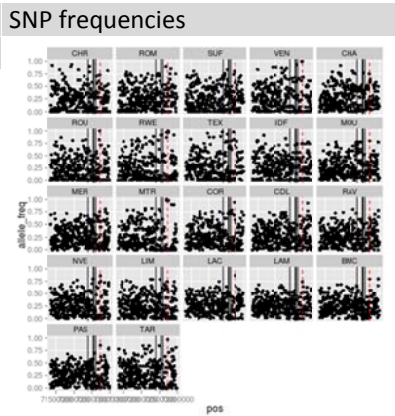

SNP local tree

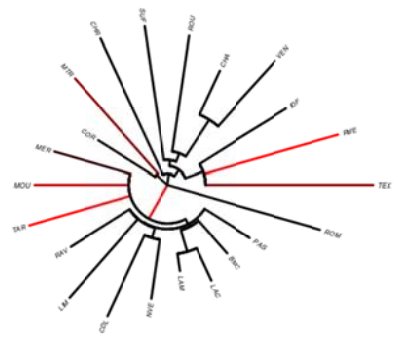

Haplotype local tree

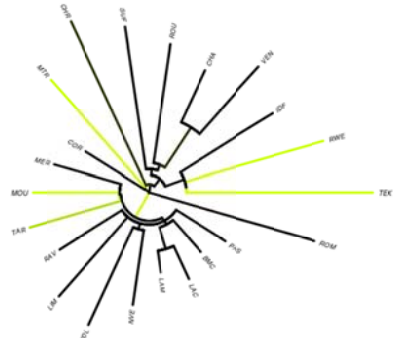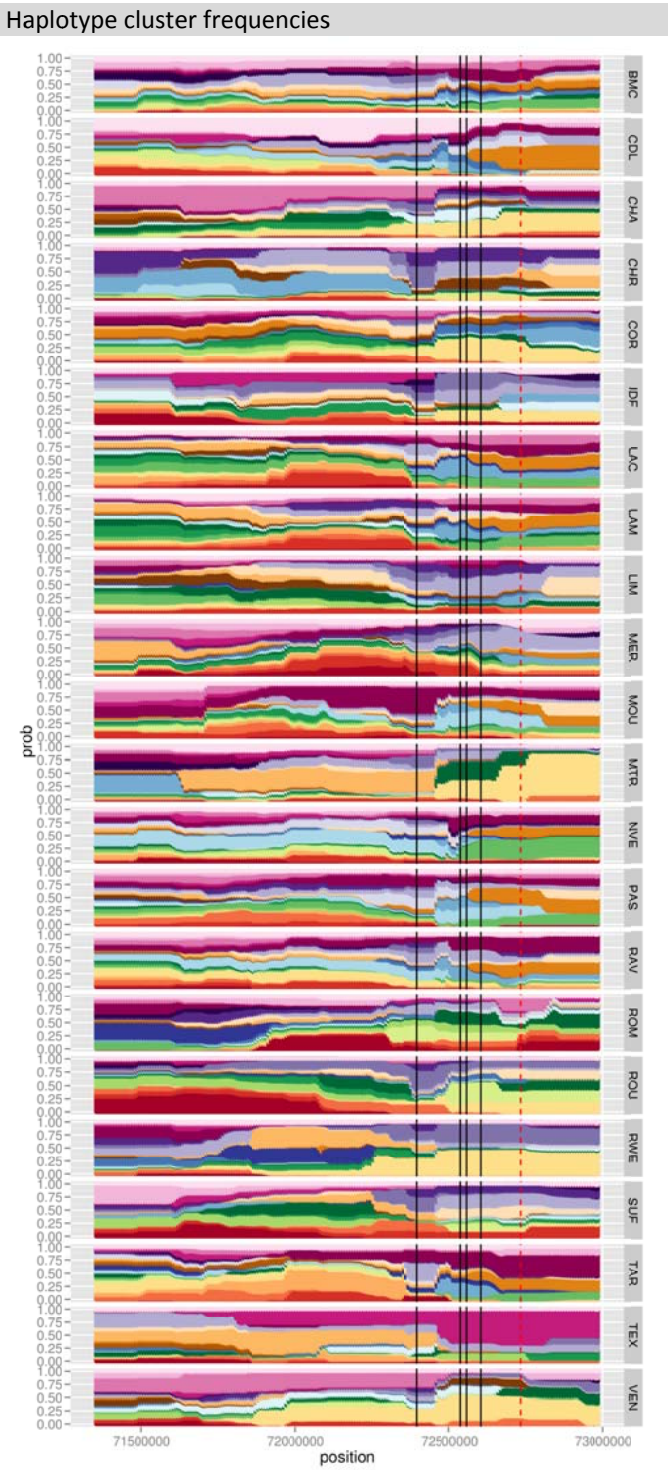

| Region |          |          |
|--------|----------|----------|
| Chr    | Begin    | End      |
| 16     | 21691437 | 24960722 |

Best SNP: 23137683  
 Located in *Ankrd55* [1].

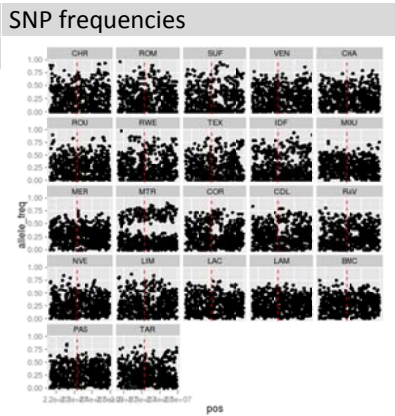

SNP local tree

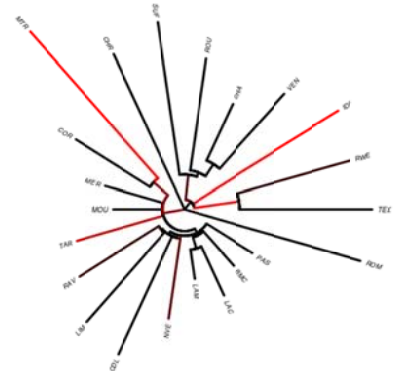

Haplotype local tree

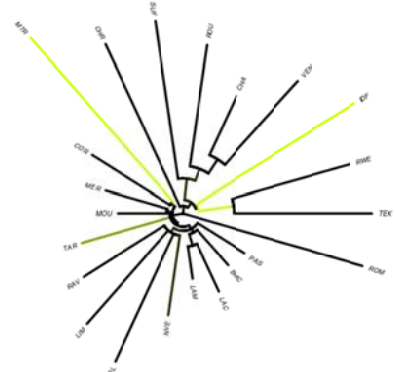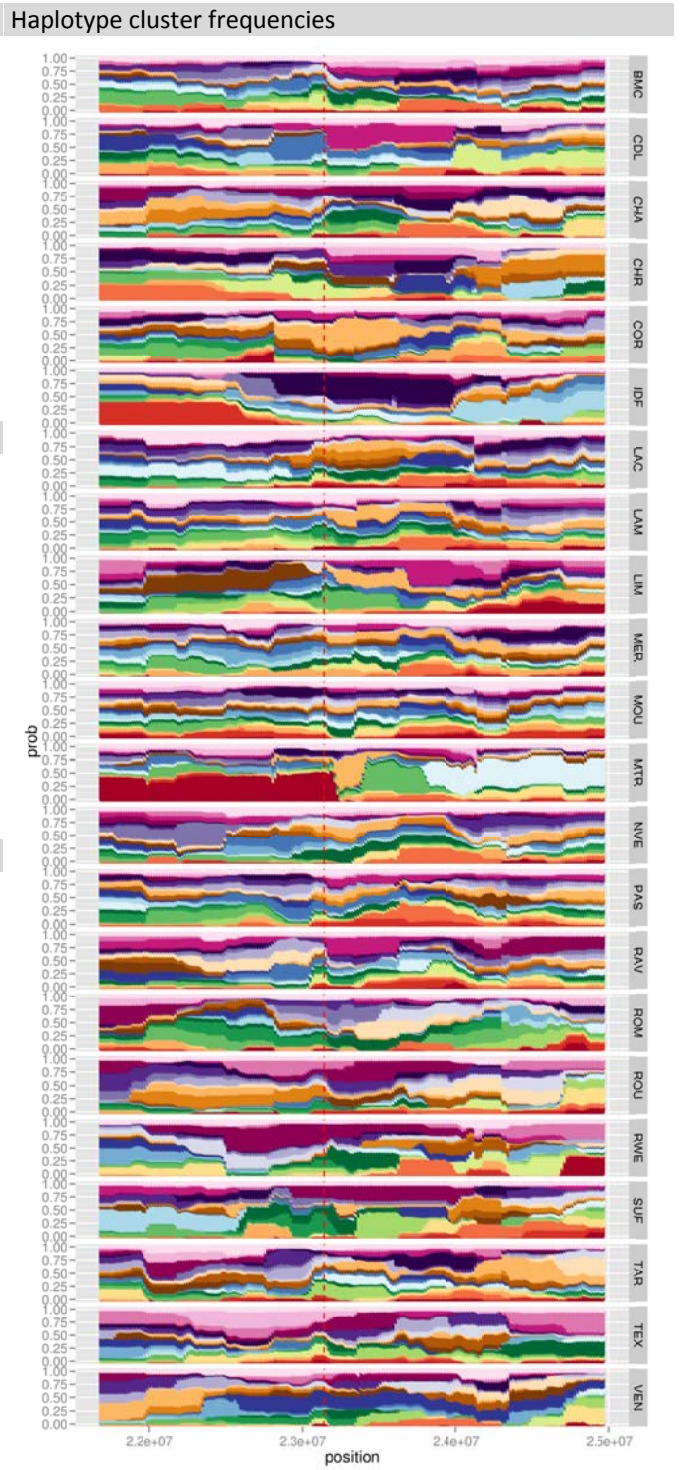



| Region |  |  | SNP frequencies | Haplotype cluster frequencies |
|--------|--|--|-----------------|-------------------------------|
|--------|--|--|-----------------|-------------------------------|

| Chr | Begin    | End      |
|-----|----------|----------|
| 16  | 38429345 | 40246375 |

Best SNP: 38664205

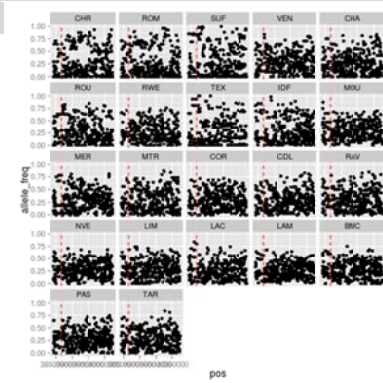

SNP local tree

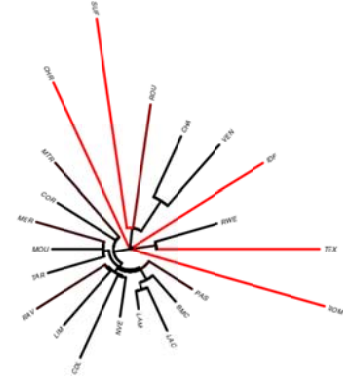

Haplotype local tree

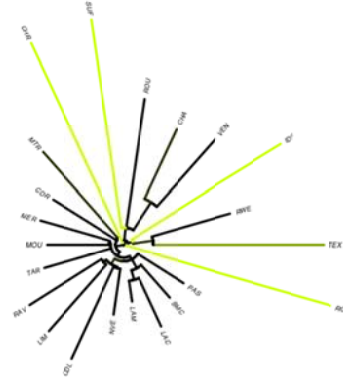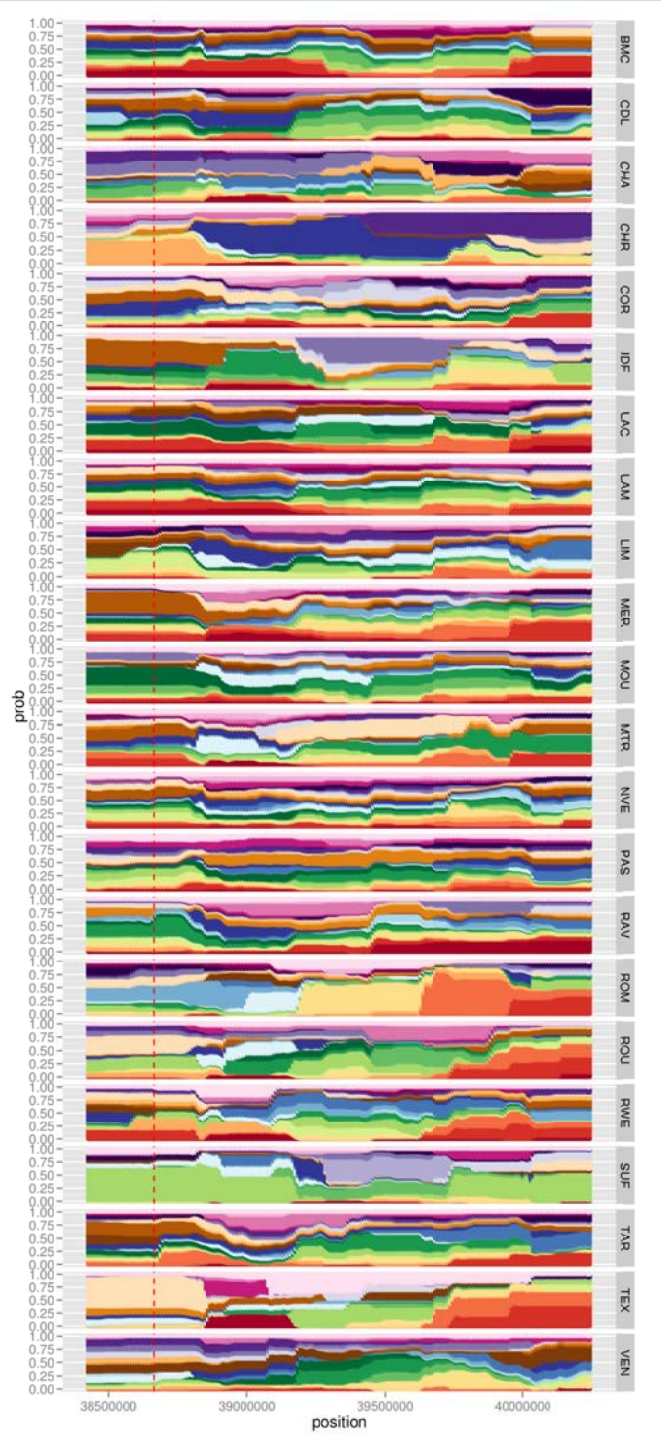

| Region |          |          |
|--------|----------|----------|
| Chr    | Begin    | End      |
| 19     | 30571699 | 33417522 |

Best SNP: 31666785  
 Located in candidate gene:  
*MITF* (involved in melanocyte development [17]).

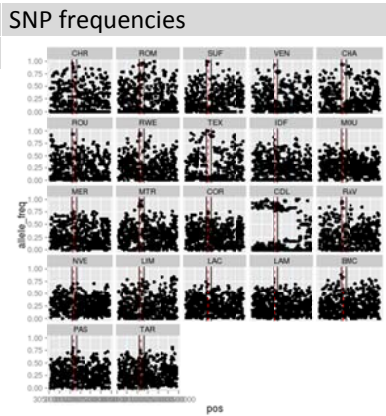

SNP local tree

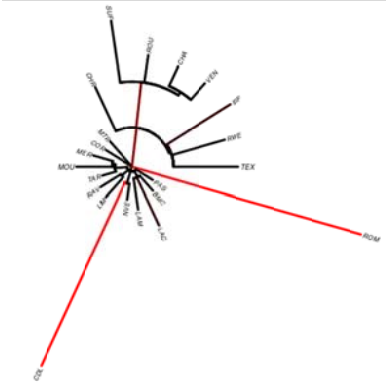

Haplotype local tree

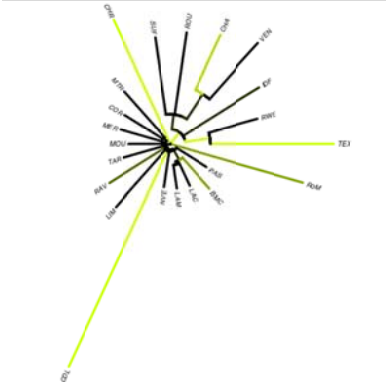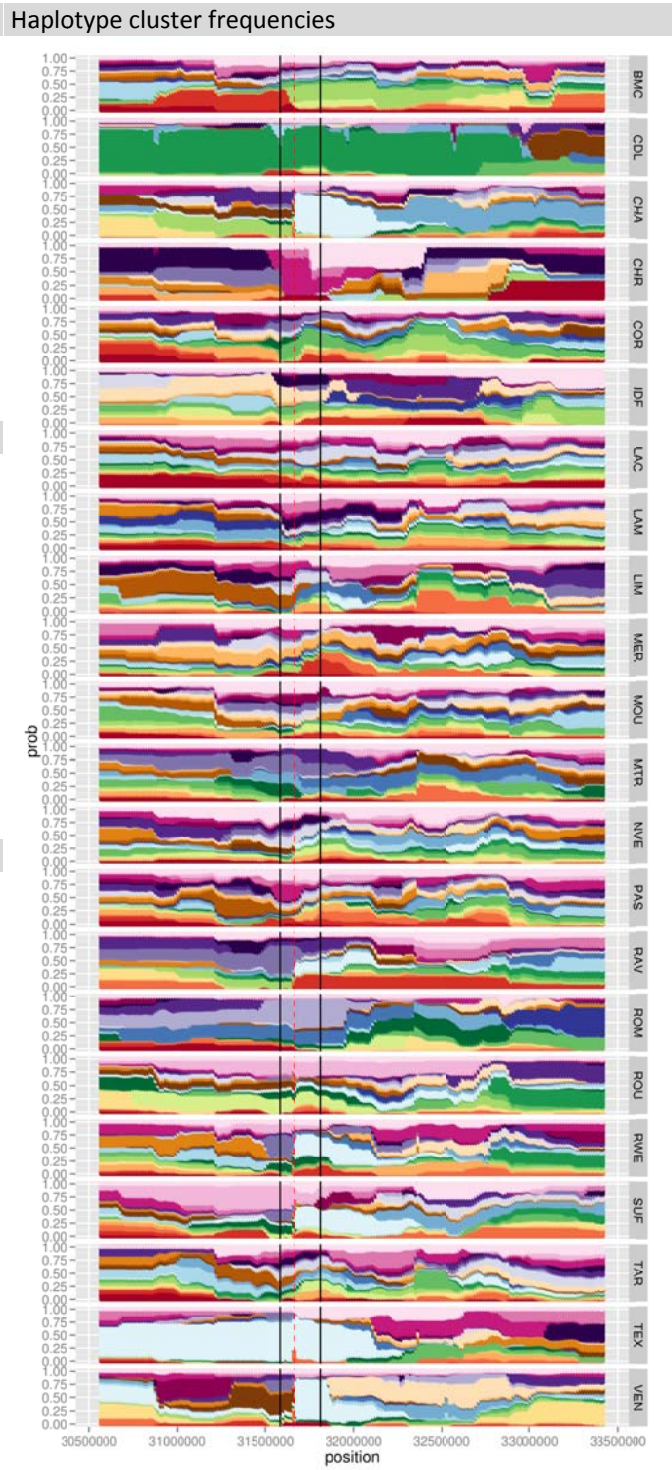

| Region |  |  | SNP frequencies | Haplotype cluster frequencies |
|--------|--|--|-----------------|-------------------------------|
|--------|--|--|-----------------|-------------------------------|

| Chr | Begin    | End      |
|-----|----------|----------|
| 19  | 36538771 | 36657385 |

Best SNP: 36584288  
 Located in candidate gene *ADAMTS9* [1] (involved both in cardiovascular development and homeostasis [18]).

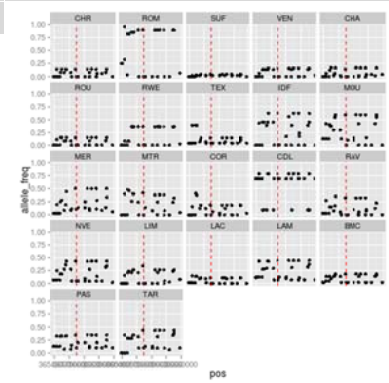

SNP local tree

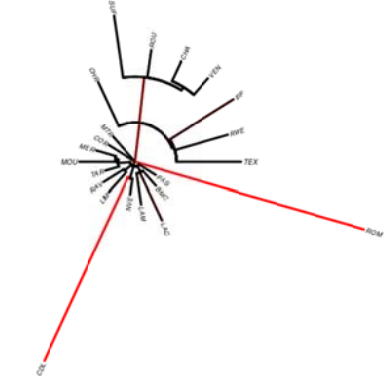

Haplotype local tree

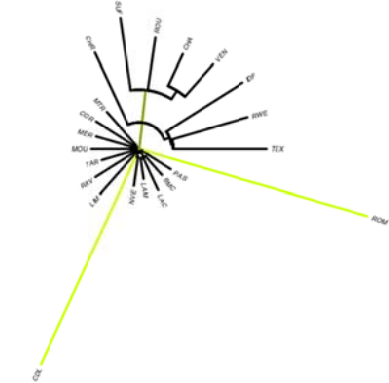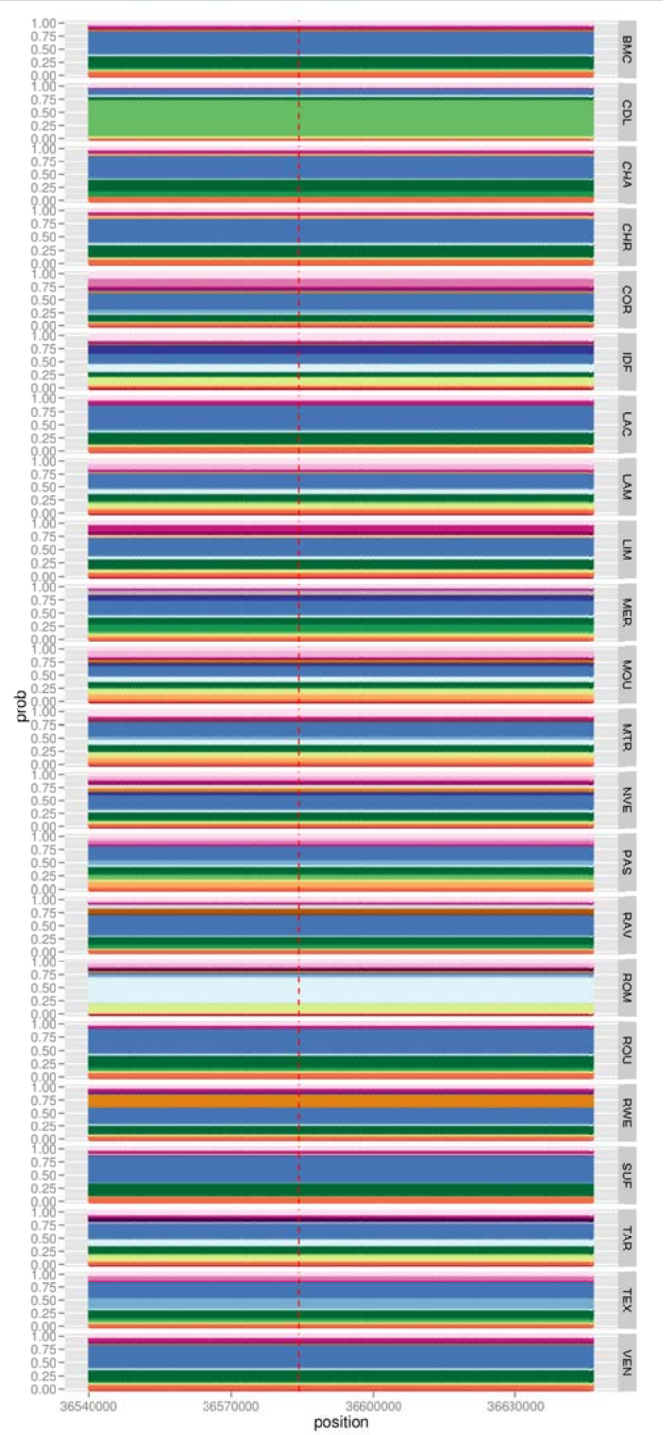

| Region |          |          |
|--------|----------|----------|
| Chr    | Begin    | End      |
| 19     | 48086301 | 53558368 |

Best SNP: 48422940  
 Located in *SEMA3G* [1].

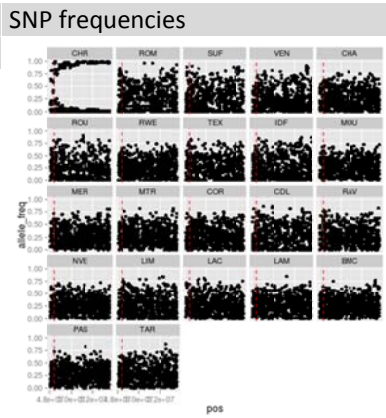

SNP local tree

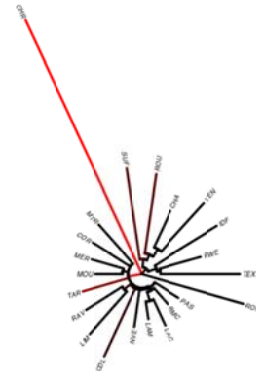

Haplotype local tree

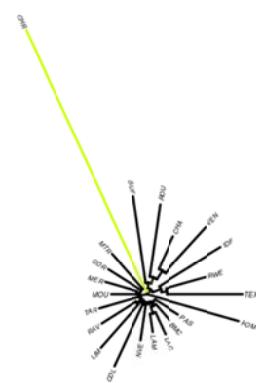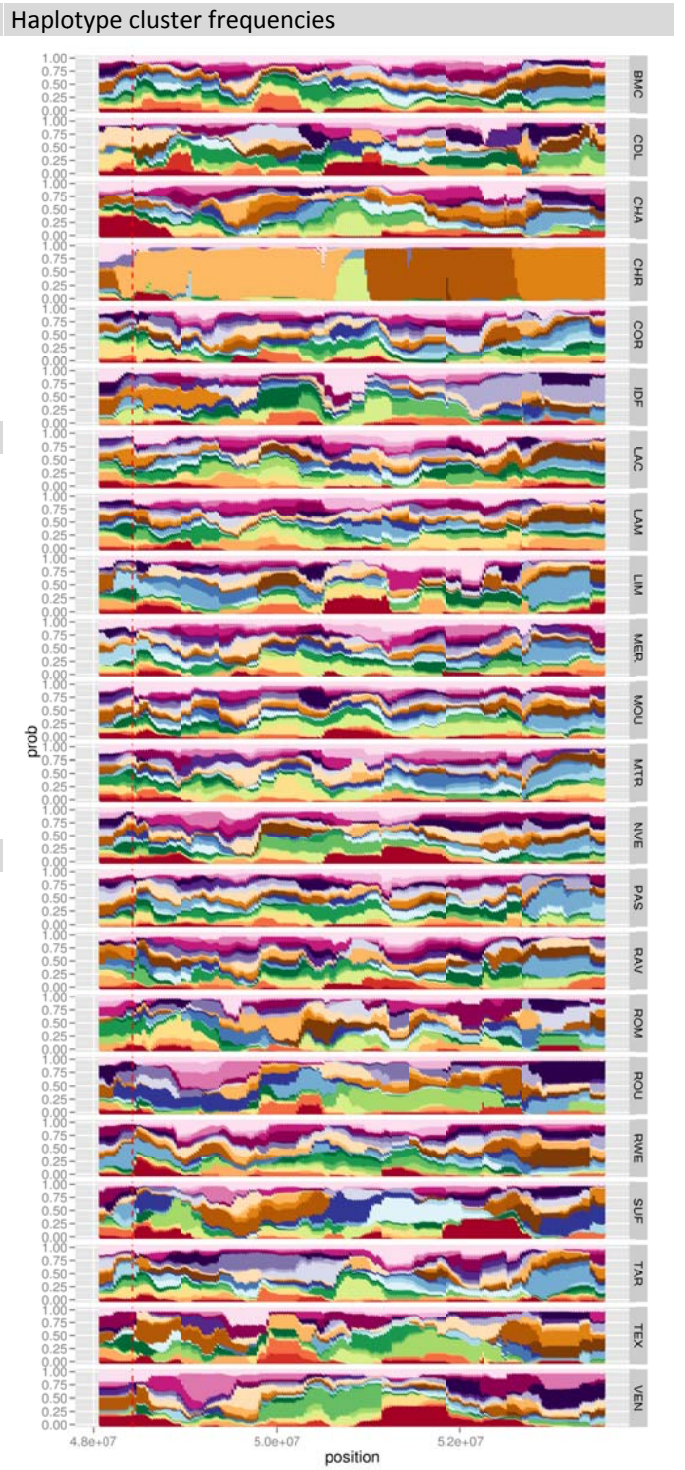

| Region |          |          |
|--------|----------|----------|
| Chr    | Begin    | End      |
| 21     | 48425709 | 49872592 |

Best SNP: 49553506

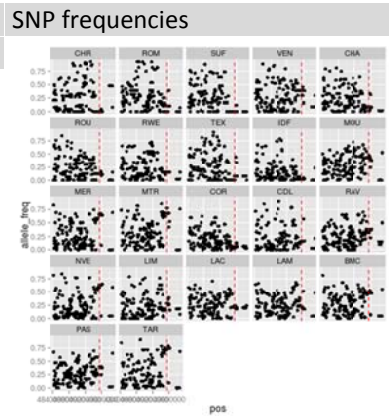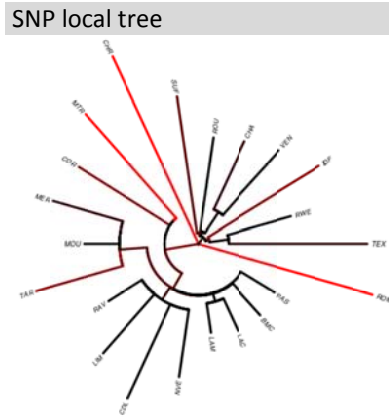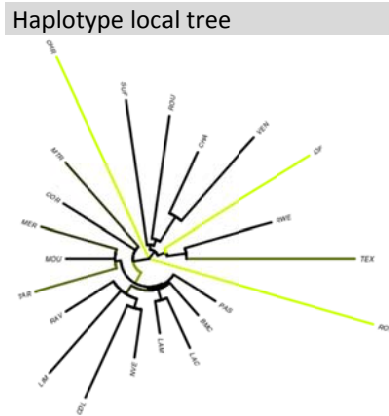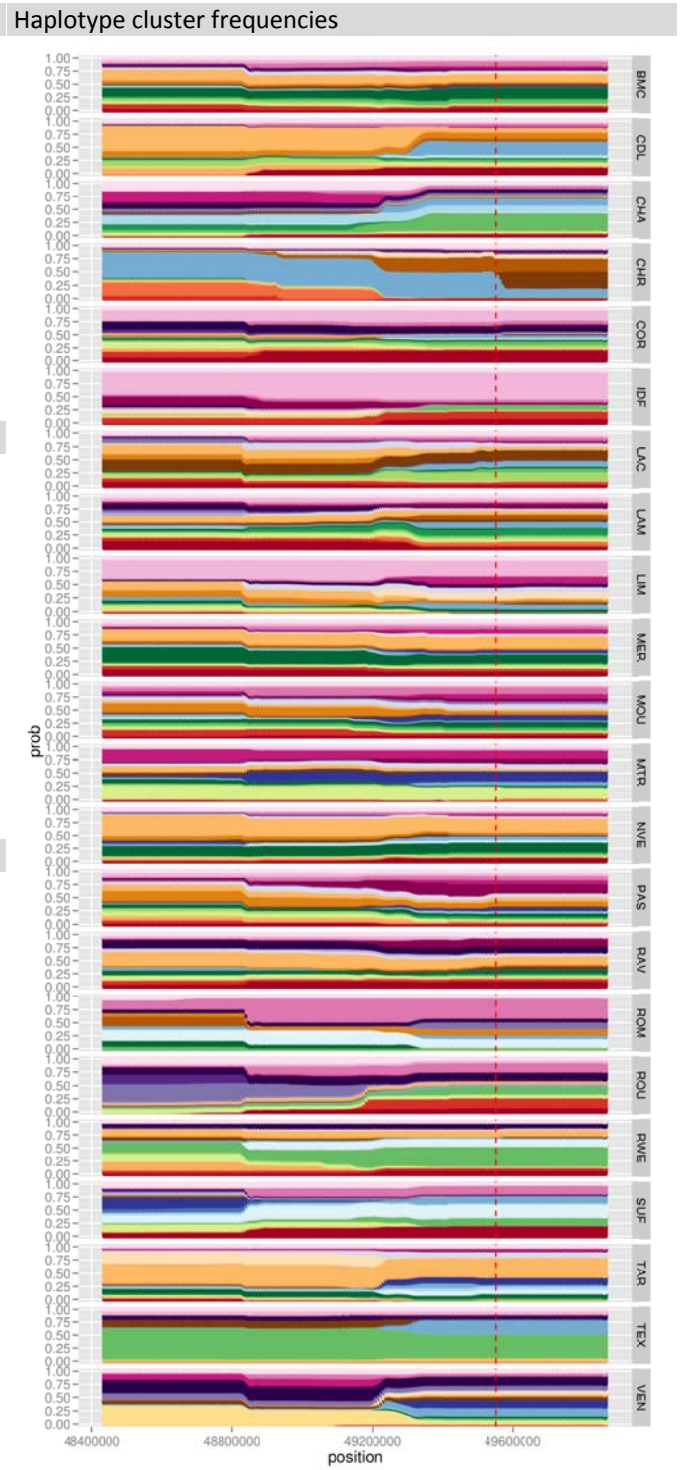



| Region             |         |          |
|--------------------|---------|----------|
| Chr                | Begin   | End      |
| 24                 | 9946422 | 10609666 |
| Best SNP: 10590023 |         |          |

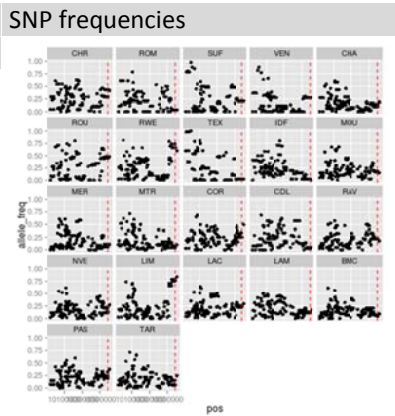

SNP local tree

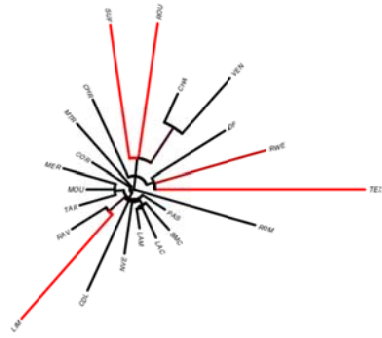

Haplotype local tree

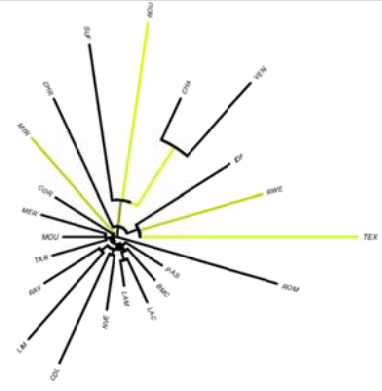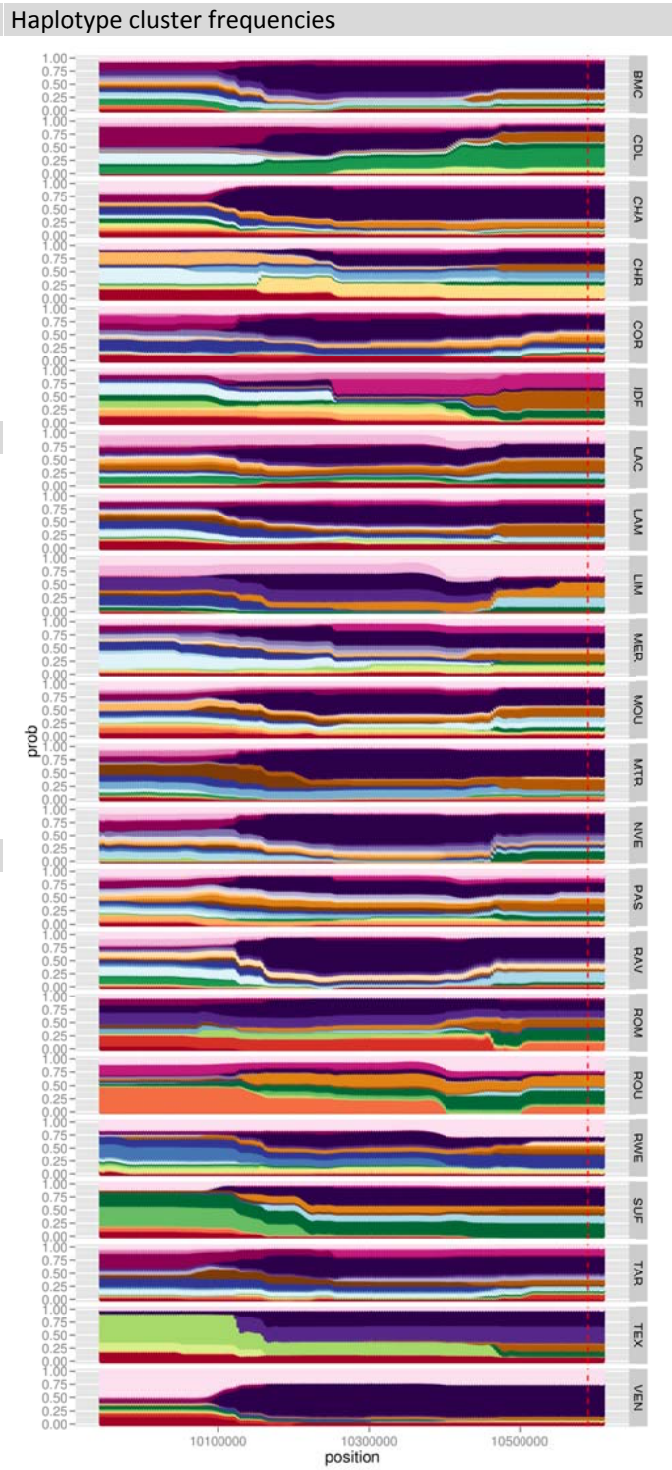

| Region |         |         |
|--------|---------|---------|
| Chr    | Begin   | End     |
| 25     | 6698813 | 8658779 |

Best SNP: 7489792  
Candidate gene *IRF2BP2*  
(associated with fleece variation in sheep [19]).

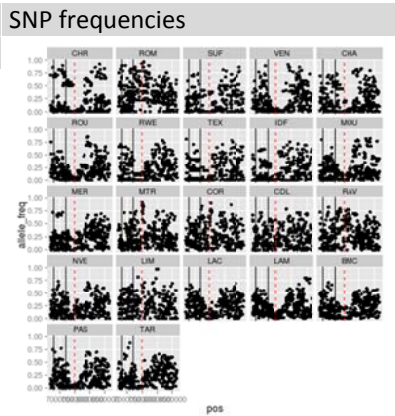

SNP local tree

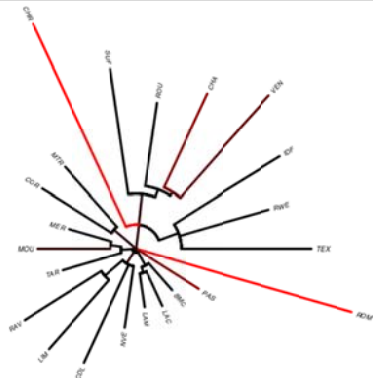

Haplotype local tree

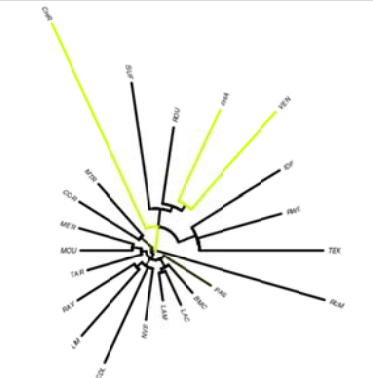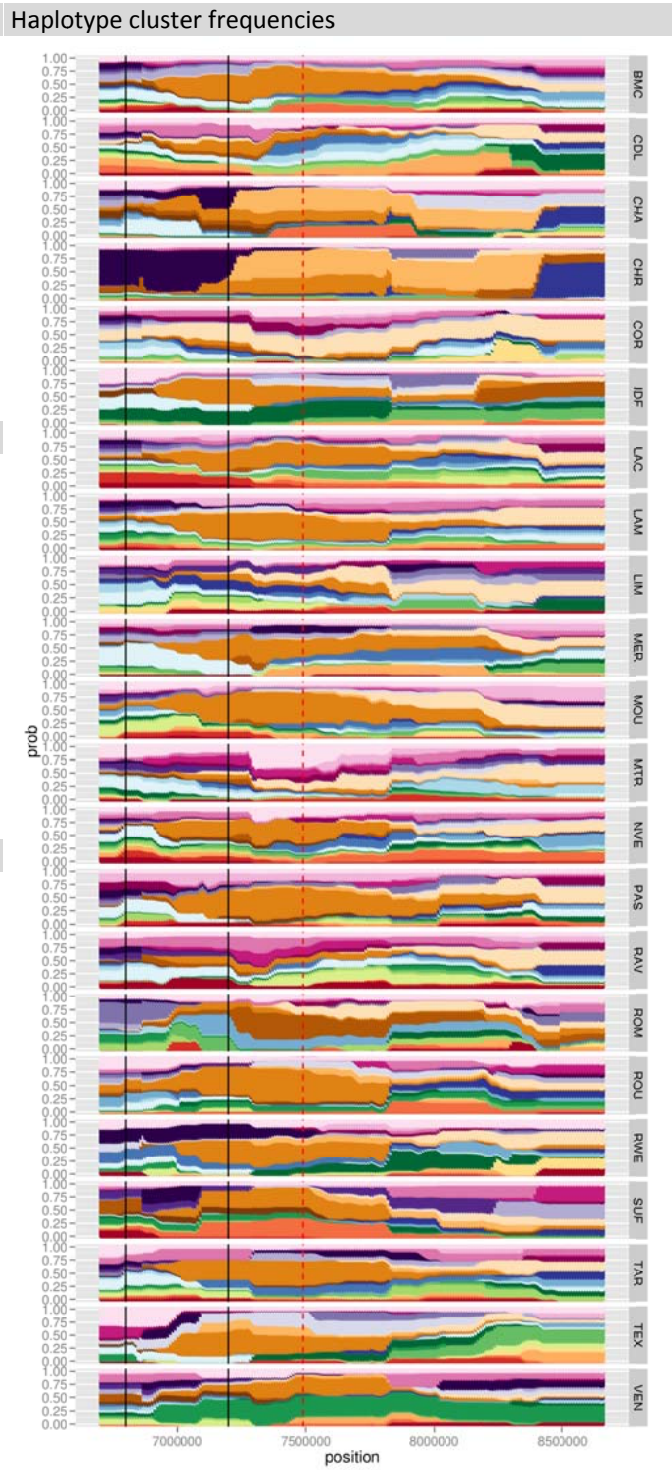

| Region |          |          |
|--------|----------|----------|
| Chr    | Begin    | End      |
| 25     | 23213400 | 26042495 |

Best SNP: 24991189  
 Located in *STOX1* [1].

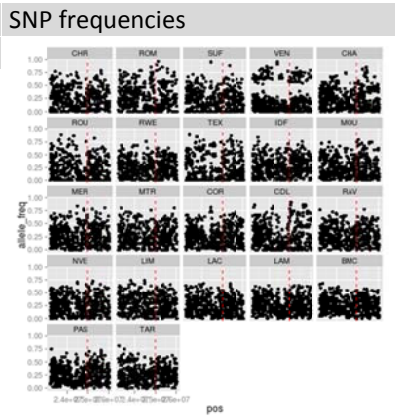

SNP local tree

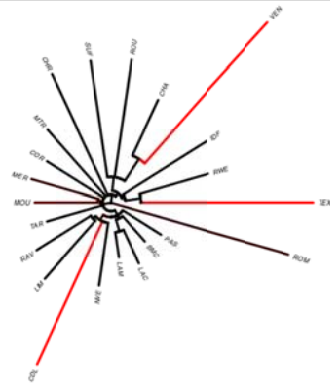

Haplotype local tree

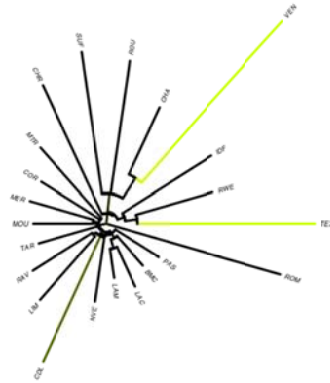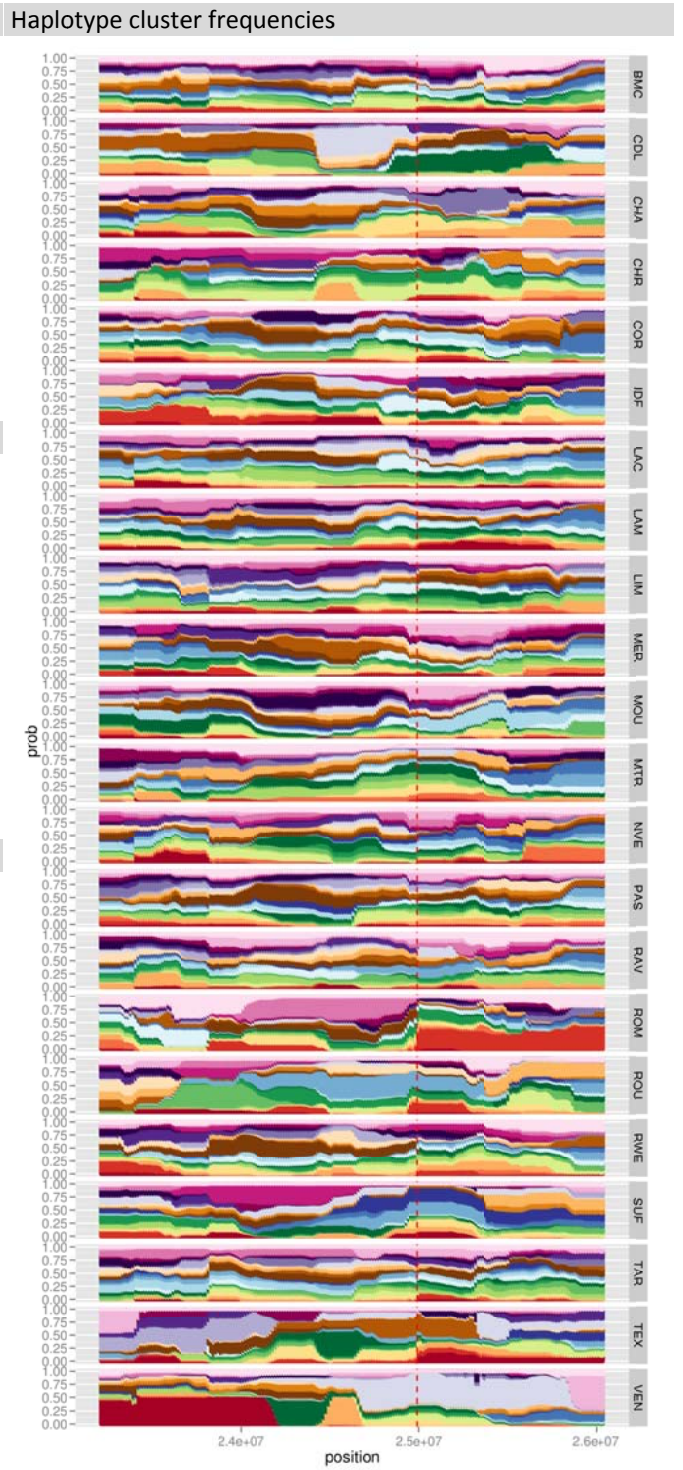

## References

1. University of California Santa Cruz. UCSC Genome Browser Gateway. <http://genome-euro.ucsc.edu/cgi-bin/hgGateway?redirect=manual&source=genome.ucsc.edu>.
2. Rajakumari S, Wu J, Ishibashi J, Lim HW, Giang AH, Won KJ, et al. EBF2 determines and maintains brown adipocyte identity. *Cell Metab.* 2013;17:562–74. doi:10.1016/j.cmet.2013.01.015.
3. Vasques GA, Amano N, Docko AJ, Funari MFA, Quedas EPS, Nishi MY, et al. Heterozygous mutations in natriuretic peptide receptor-B (NPR2) gene as a cause of short stature in patients initially classified as idiopathic short stature. *J Clin Endocrinol Metab.* 2013;98:1636–44.
4. Gratten J, Beraldi D, Lowder B V, McRae a F, Visscher PM, Pemberton JM, et al. Compelling evidence that a single nucleotide substitution in TYRP1 is responsible for coat-colour polymorphism in a free-living population of Soay sheep. *Proc Biol Sci.* 2007;274:619–26.
5. Jacobs LC, Wollstein A, Lao O, Hofman A, Klaver CC, Uitterlinden AG, et al. Comprehensive candidate gene study highlights UGT1A and BNC2 as new genes determining continuous skin color variation in Europeans. *Hum Genet.* 2013;132:147–58.
6. Rico-Bautista E, Flores-Morales A, Fernández-Pérez L. Suppressor of cytokine signaling (SOCS) 2, a protein with multiple functions. *Cytokine Growth Factor Rev.* 2006;17:431–9.
7. Rupp R, Senin P, Sarry J, Allain C, Tasca C, Ligat L, et al. A Point Mutation in Suppressor of Cytokine Signalling 2 (Socs2) Increases the Susceptibility to Inflammation of the Mammary Gland while Associated with Higher Body Weight and Size and Higher Milk Production in a Sheep Model. *PLoS Genet.* 2015;11:1–19. doi:10.1371/journal.pgen.1005629.
8. Jones P, Chase K, Martin A, Davern P, Ostrander EA, Lark KG. Single-nucleotide-polymorphism-based association mapping of dog stereotypes. *Genetics.* 2008;179:1033–44.
9. Zhang L, Liang J, Luo W, Liu X, Yan H, Zhao K, et al. Genome-wide scan reveals LEMD3 and WIF1 on SSC5 as the candidates for porcine ear size. *PLoS One.* 2014;9:1–9.
10. García-Fernández M, Gutiérrez-Gil B, Sánchez JP, Morán JA, García-Gámez E, Álvarez L, et al. The role of bovine causal genes underlying dairy traits in Spanish Churra sheep. *Anim Genet.* 2011;42:415–20.
11. Sahana G, Höglund JK, Guldbbrandtsen B, Lund MS. Loci associated with adult stature also affect calf birth survival in cattle. *BMC Genet.* 2015;16:47. doi:10.1186/s12863-015-0202-3.
12. Johnston SE, McEwan JC, Pickering NK, Kijas JW, Beraldi D, Pilkington JG, et al. Genome-wide association mapping identifies the genetic basis of discrete and quantitative variation in sexual weaponry in a wild sheep population. *Mol Ecol.* 2011;20:2555–66.
13. Cieslak M, Reissmann M, Hofreiter M, Ludwig A. Colours of domestication. *Biol Rev.* 2011;86:885–99.
14. Ducrest AL, Keller L, Roulin A. Pleiotropy in the melanocortin system, coloration and behavioural syndromes. *Trends Ecol Evol.* 2008;23:502–10.
15. Fariello M-I, Servin B, Tosser-Klopp G, Rupp R, Moreno C, San Cristobal M, et al. Selection signatures in worldwide sheep populations. *PLoS One.* 2014;9:e103813.
16. Li C, Sun D, Zhang S, Wang S, Wu X, Zhang Q, et al. Genome wide association study identifies 20 novel promising genes associated with milk fatty acid traits in Chinese Holstein. *PLoS One.* 2014;9.
17. Levy C, Khaled M, Fisher DE. MITF: master regulator of melanocyte development and melanoma oncogene. *Trends Mol Med.* 2006;12:406–14.
18. Kern CB, Wessels A, McGarity J, Dixon LJ, Alston E, Argraves WS, et al. Reduced versican cleavage

due to *Adamts9* haploinsufficiency is associated with cardiac and aortic anomalies. *Matrix Biol.* 2010;29:304–16.

19. Demars J, Cano M, Drouilhet L, Plisson-Petit F, Bardou P, Fabre S, et al. Genome-wide identification of the mutation underlying fleece variation and discriminating ancestral hairy species from modern woolly sheep. *Mol Biol Evol.* 2017;msx114.
