# Supplementary material for: Revealing the selection history of adaptive loci using genome-wide scans for selection: an example from domestic sheep
Source: PubMed Central journal article supplement (PMC5778797; doi:10.1186/s12864-018-4447-x), 2018-01-23
Supplement: 12864_2018_4447_MOESM12_ESM.pdf [file 12864_2018_4447_MOESM12_ESM.pdf]

| Seq. name        | Matrix Family | Detailed Family Information                       | Matrix         | Detailed Matrix Information                               | Tissue                                                                                                                                                                                                                   | Opt. | Start position | End position | Anchor position | Strand | Core sim. | Matrix sim. | Mat. sim. - opt. | Evidence # | Sequence                      |
|------------------|---------------|---------------------------------------------------|----------------|-----------------------------------------------------------|--------------------------------------------------------------------------------------------------------------------------------------------------------------------------------------------------------------------------|------|----------------|--------------|-----------------|--------|-----------|-------------|------------------|------------|-------------------------------|
| MC1R_ROM         | O\$MTEN       | Core promoter motif ten elements                  | O\$DMTE.01     | Drosophila motif ten element                              |                                                                                                                                                                                                                          | 0.77 | 1096           | 1116         | 1106            | +      | 0.875     | 0.785       | 0.015            | 0          | gtgaccaATCGcagctcggcg         |
| MC1R_SUF_A-G-del | V\$HASF       | HIF-1 ancillary sequence family                   | V\$HAS.01      | HIF-1 ancillary sequence                                  |                                                                                                                                                                                                                          | 0.91 | 1212           | 1222         | 1217            | +      | 1         | 0.91        | 0                | 0          | tctCACGccct                   |
| MC1R_SUF_A-G-ins | V\$CP2F       | CP2-erythrocyte Factor related to drosophila Elf1 | V\$TCFCP2L1.01 | Transcription factor CP2-like 1 (LBP-9)                   | Blood Cells                                                                                                                                                                                                              | 0.87 | 1372           | 1390         | 1381            | +      | 1         | 0.877       | 0.007            | 0          | ggCTGGTtcaggctgagg            |
| MC1R_SUF_A-G-ins | V\$RXRF       | RXR heterodimer binding sites                     | V\$VDR_RXR.03  | Bipartite binding site of VDR/RXR heterodimers, DR1 sites | Bone and Bones, Brain, Central Nervous System, Connective Tissue, Digestive System, Ear, Endocrine System, Integumentary System, Liver, Nervous System, Parathyroid Glands, Pituitary Gland, Skeleton, and Thyroid Gland | 0.74 | 1369           | 1393         | 1381            | +      | 1         | 0.746       | 0.006            | 0          | catggctGGTtcaggctgaggtcc      |
| MC1R_SUF_A-G-ins | V\$PAX5       | PAX-2/5/8 binding sites                           | V\$PAX5.01     | B-cell-specific activator protein                         | Antibody-Producing Cells, Endocrine System, Immune System, and Thyroid Gland                                                                                                                                             | 0.79 | 1372           | 1400         | 1386            | +      | 0.81      | 0.793       | 0.003            | 0          | ggctggTTCAgggctgaggtcccagcaca |
